# Supplementary material for: Activation of metal-involved halogen bonds and classical halogen bonds in gold(i) catalysis
Source: Royal Society of Chemistry journal article supplement (doi:10.1039/d3dt00158j), 2023-01-01
Supplement: d3dt00158j1.pdf [file d3dt00158j1.pdf]

**Supporting Information for**  
**Activation of metal-involved halogen bonds and classical**  
**halogen bonds in gold(I) catalysis**

Ying Li, Yuanyuan Sun, Chang Zhao, Yanli Zeng\*  
College of Chemistry and Materials Science, Hebei Key Laboratory of Inorganic  
Nano-materials, Hebei Normal University, Shijiazhuang, China, 050024

Figure S1. Gibbs energy curves of the cyclization via  $C_6F_5I$  activating the Cl atom of  $Ph_3PAuCl$ .

Figure S2. Gibbs energy curves of the cyclization via  $C_8H_9O_2I$  activating the Cl atom of  $Ph_3PAuCl$ .

Figure S3. AIM molecular graphs of the complexes: (a)  $N-I\cdots Cl$ ; (b)  $N-I\cdots Au$ .

Table S1. The angles (in  $^\circ$ ) of  $Cl-I-N$  from COM1 to IM2 (IM2') via  $C_4H_2INO_2$  activating the Cl atom.

Table S2. The angles (in  $^\circ$ ) of  $Au-I-N$  from COM1a to IM2a (IM2a') via  $C_4H_2INO_2$  activating the Au atom.

Table S3. Topological and energetic properties at the BCPs of the  $N-I\cdots Cl$  halogen bond in COM1 (all values in a.u.).

Table S4. Topological and energetic properties at the BCPs of the  $N-I\cdots Au$  halogen bond in COM1a (all values in a.u.).

Table S5. Topological and energetic properties at the BCPs of the  $Au-Cl$  bond in COM1 (all values in a.u.).

Table S6. Topological and energetic properties at the BCPs of the  $Au-Cl$  bond in COM1a (all values in a.u.).

Table S7-S34. Calculated Gibbs energy and XYZ coordinates for all atoms activated by halogen bond donors ( $C_4H_2INO_2$ ,  $C_6F_5I$ ,  $C_8H_9O_2I$ ).

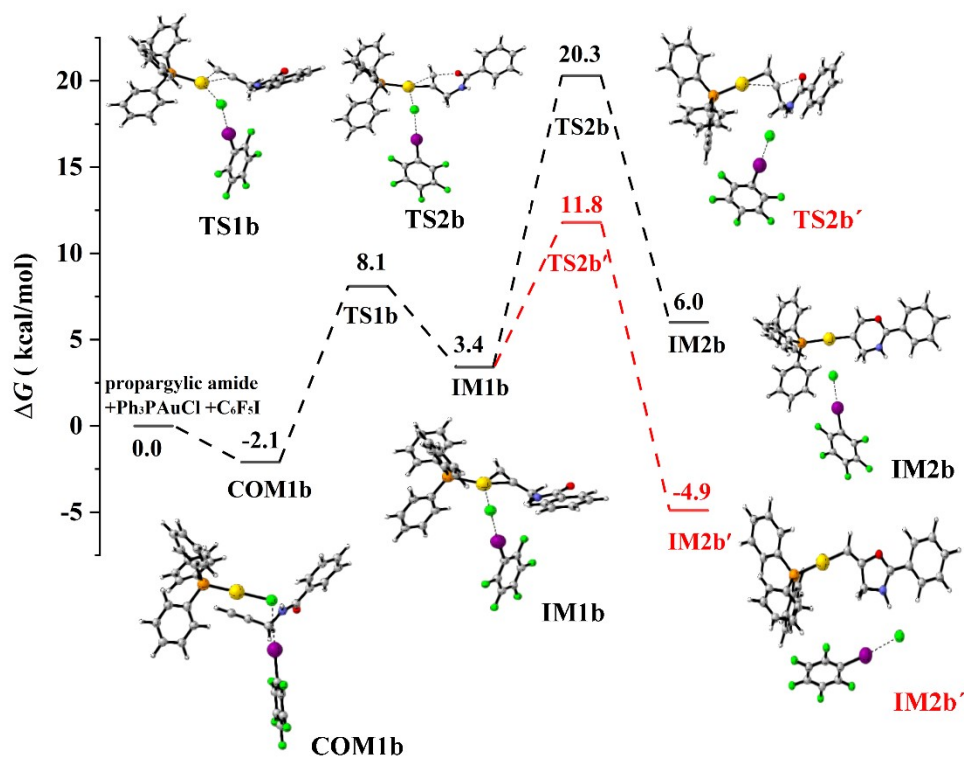

Figure S1. Gibbs energy curves of the cyclization via C<sub>6</sub>F<sub>5</sub>I activating the Cl atom of Ph<sub>3</sub>PAuCl.

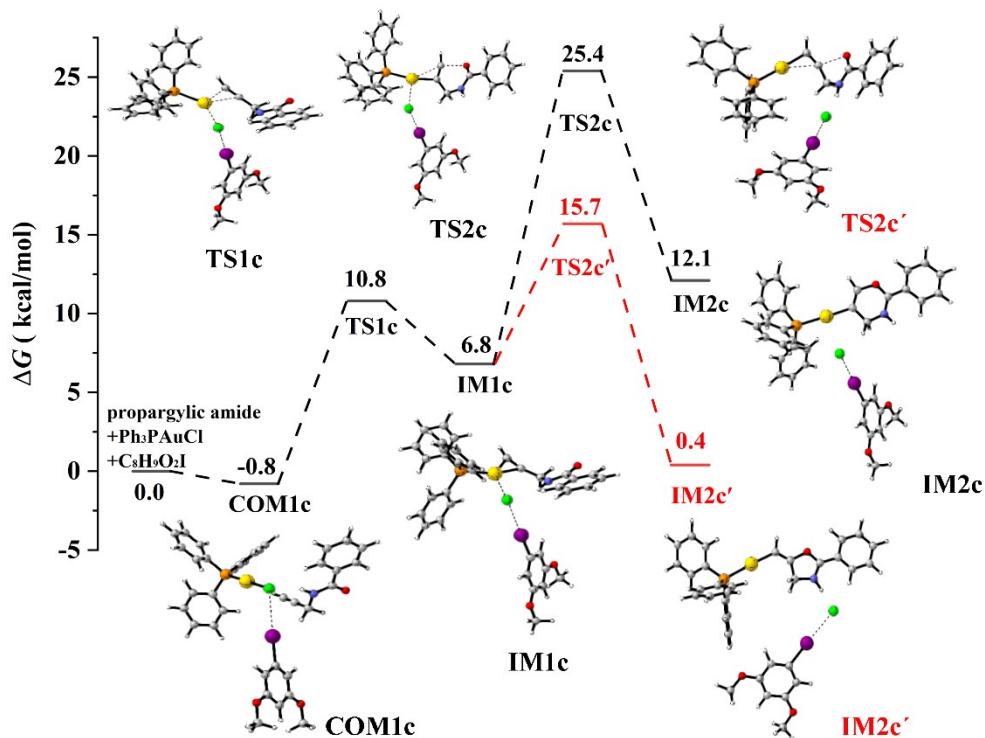

Figure S2. Gibbs energy curves of the cyclization via C<sub>8</sub>H<sub>9</sub>O<sub>2</sub>I activating the Cl atom of Ph<sub>3</sub>PAuCl.

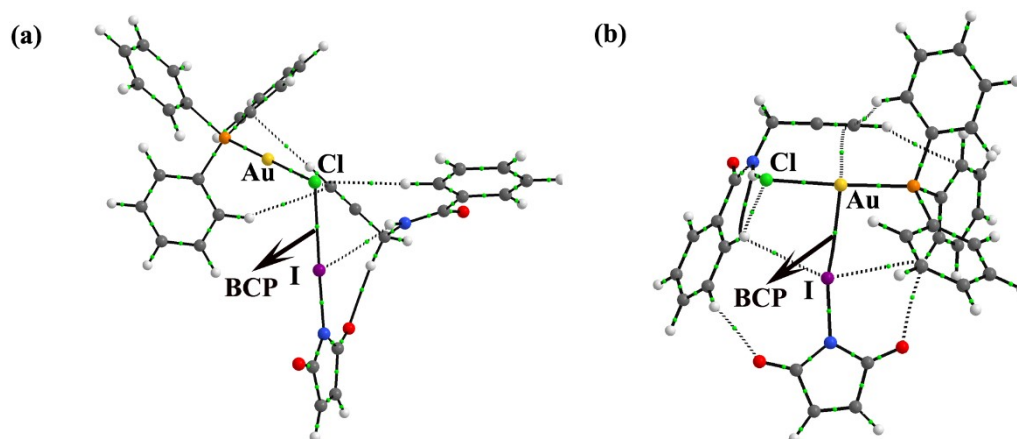

Figure S3. AIM molecular graphs of the complexes: (a) N-I...Cl; (b) N-I...Au.

Table S1. The angles (in  $^{\circ}$ ) of Cl-I-N from COM1 to IM2 (IM2') via  $C_4H_2INO_2$  activating the Cl atom.

|        | COM1  | TS1   | IM1   | TS2   | IM2   | TS2'  | IM2'  |
|--------|-------|-------|-------|-------|-------|-------|-------|
| Cl-I-N | 178.5 | 176.1 | 175.0 | 179.5 | 179.2 | 179.4 | 174.0 |

Table S2. The angles (in  $^{\circ}$ ) of Au-I-N from COM1a to IM2a (IM2a') via  $C_4H_2INO_2$  activating the Au atom.

|        | COM1a | TS1a  | IM1a  | TS2a  | IM2a  | TS2a' | IM2a' |
|--------|-------|-------|-------|-------|-------|-------|-------|
| Cl-I-N | 169.5 | 171.7 | 169.5 | 169.3 | 173.1 | 171.8 | 164.6 |

Table S3. Topological and energetic properties at the BCPs of the N-I...Cl halogen bond in COM1 (all values in a.u.).

| N-I...Cl | $\rho$ | $\nabla^2\rho_b$ | $G_b$  | $V_b$   | $-G_b/V_b$ |
|----------|--------|------------------|--------|---------|------------|
| I...Cl   | 0.0320 | 0.0687           | 0.0189 | -0.0206 | 0.9164     |

Table S4. Topological and energetic properties at the BCPs of the N-I...Au halogen bond in COM1a (all values in a.u.).

| N-I...Au | $\rho$ | $\nabla^2\rho_b$ | $G_b$  | $V_b$   | $-G_b/V_b$ |
|----------|--------|------------------|--------|---------|------------|
| I...Au   | 0.0307 | 0.0566           | 0.0168 | -0.0194 | 0.8641     |

Table S5. Topological and energetic properties at the BCPs of the Au-Cl bond in COM1 (all values in a.u.).

| Au-Cl | $\rho$ | $\nabla^2\rho_b$ | $G_b$  | $V_b$   | $-G_b/V_b$ |
|-------|--------|------------------|--------|---------|------------|
|       | 0.0848 | 0.2018           | 0.0751 | -0.0998 | 0.7525     |

Table S6 Topological and energetic properties at the BCPs of the Au–Cl bond in COM1a (all values in a.u.).

| Au–Cl | $\rho$ | $\nabla^2\rho_b$ | $G_b$  | $V_b$   | $-G_b/V_b$ |
|-------|--------|------------------|--------|---------|------------|
|       | 0.0899 | 0.1990           | 0.0776 | -0.1055 | 0.7355     |

Table S7. Calculated Gibbs energy and XYZ coordinates for all atoms in **COM1** activated by C<sub>4</sub>H<sub>2</sub>INO<sub>2</sub>.

$G = -2803.3342$  Hartree

|    |             |             |             |
|----|-------------|-------------|-------------|
| P  | -3.20641600 | -0.08417100 | 0.04614300  |
| C  | -3.34071100 | 1.48565900  | 0.99205600  |
| Au | -1.19860600 | -0.27690300 | -1.00471000 |
| C  | -4.55831200 | 2.19076000  | 1.09101800  |
| H  | -5.45959100 | 1.82042300  | 0.57920800  |
| C  | -4.62002100 | 3.37598000  | 1.84215900  |
| H  | -5.57146600 | 3.92535100  | 1.91309000  |
| C  | -3.47471500 | 3.85997400  | 2.49532900  |
| H  | -3.52643200 | 4.79153200  | 3.07998000  |
| C  | -2.26024400 | 3.15949600  | 2.39593100  |
| H  | -1.35836600 | 3.53856200  | 2.90070900  |
| C  | -2.18827400 | 1.97804900  | 1.64310000  |
| H  | -1.23224600 | 1.43649000  | 1.55615000  |
| C  | -3.50189000 | -1.44738800 | 1.24235100  |
| C  | -3.11288900 | -2.75451500 | 0.87507800  |
| H  | -2.62866600 | -2.93135400 | -0.09897500 |
| C  | -3.33027600 | -3.82387800 | 1.75607200  |
| H  | -3.02276700 | -4.84022300 | 1.46573700  |
| C  | -3.92531100 | -3.59581300 | 3.00926500  |
| H  | -4.08582500 | -4.43521900 | 3.70339000  |
| C  | -4.30687200 | -2.29584600 | 3.37922700  |
| H  | -4.76918100 | -2.11305500 | 4.36155700  |
| C  | -4.09870500 | -1.21980100 | 2.49977700  |
| H  | -4.39793000 | -0.20360800 | 2.79831500  |
| C  | -4.61969000 | -0.10881200 | -1.12768100 |
| C  | -5.83831800 | -0.74355300 | -0.80951300 |
| H  | -5.96007700 | -1.26400200 | 0.15263500  |
| C  | -6.90084600 | -0.71488900 | -1.72789500 |
| H  | -7.84905200 | -1.21527800 | -1.47757000 |
| C  | -6.75409900 | -0.05563900 | -2.95925300 |
| H  | -7.58849100 | -0.03886500 | -3.67748600 |
| C  | -5.53944000 | 0.57600800  | -3.27816500 |
| H  | -5.41811400 | 1.08788000  | -4.24521700 |
| C  | -4.47159100 | 0.54713300  | -2.36923800 |
| H  | -3.51445100 | 1.03049400  | -2.62434800 |
| Cl | 0.89058400  | -0.48223000 | -2.13295500 |

|   |             |             |             |
|---|-------------|-------------|-------------|
| C | 1.16374000  | -1.13086700 | 2.74689200  |
| C | -0.05097500 | -1.25523700 | 2.84392600  |
| H | -1.12369800 | -1.37951500 | 2.94113400  |
| C | 2.61816100  | -0.97036500 | 2.62248400  |
| H | 2.87357200  | 0.11238500  | 2.60874900  |
| H | 3.11970000  | -1.42723900 | 3.50209700  |
| N | 3.17424900  | -1.61547800 | 1.44363100  |
| H | 3.02159700  | -1.15851100 | 0.54061800  |
| C | 3.93953300  | -2.74619500 | 1.53061200  |
| O | 4.22760100  | -3.27224100 | 2.61445900  |
| C | 4.43979100  | -3.31457700 | 0.22427100  |
| C | 5.51573900  | -4.22512600 | 0.28936300  |
| C | 3.87297000  | -3.01224800 | -1.03282500 |
| C | 6.03228000  | -4.80447300 | -0.87744400 |
| H | 5.93387400  | -4.46487300 | 1.27860500  |
| C | 4.38619800  | -3.59899900 | -2.20028800 |
| H | 3.01003400  | -2.33332100 | -1.11863100 |
| C | 5.46870500  | -4.49148700 | -2.12698200 |
| H | 6.87802200  | -5.50690200 | -0.81347500 |
| H | 3.93013200  | -3.35928000 | -3.17344200 |
| H | 5.87048700  | -4.94843200 | -3.04490000 |
| C | 4.04844800  | 3.07930200  | 1.44739700  |
| C | 4.90598000  | 4.30461000  | 1.64027500  |
| C | 5.03339100  | 4.93025200  | 0.45301600  |
| C | 4.26562500  | 4.15027800  | -0.58370400 |
| N | 3.70670600  | 3.05402900  | 0.09208300  |
| H | 5.32212600  | 4.57311700  | 2.62074100  |
| H | 5.58160200  | 5.84851000  | 0.20219500  |
| O | 3.71620200  | 2.26961200  | 2.30241800  |
| O | 4.14240900  | 4.40414200  | -1.77113800 |
| I | 2.49001400  | 1.57626500  | -0.83898700 |

Table S8. Calculated Gibbs energy and XYZ coordinates for all atoms in **TS1** activated by C<sub>4</sub>H<sub>2</sub>INO<sub>2</sub>.

$G = -2803.3199$  Hartree    Frequency =  $-50.45$

|    |            |             |             |
|----|------------|-------------|-------------|
| P  | 3.12593900 | -0.13636900 | -0.03012200 |
| C  | 3.39826300 | -1.92381300 | -0.36246300 |
| Au | 0.87622800 | 0.33720600  | 0.17232100  |
| C  | 4.51889200 | -2.38031900 | -1.08835300 |
| H  | 5.25001800 | -1.66326500 | -1.49208300 |
| C  | 4.69940400 | -3.75619900 | -1.30254400 |
| H  | 5.57291100 | -4.10741300 | -1.87337700 |

|    |             |             |             |
|----|-------------|-------------|-------------|
| C  | 3.76947100  | -4.67961300 | -0.79596700 |
| H  | 3.91303300  | -5.75727200 | -0.97040200 |
| C  | 2.65103300  | -4.22716100 | -0.07561500 |
| H  | 1.91490100  | -4.94641700 | 0.31505700  |
| C  | 2.46084200  | -2.85336700 | 0.13741500  |
| H  | 1.57415000  | -2.49344800 | 0.68519400  |
| C  | 4.08692600  | 0.25985500  | 1.48804700  |
| C  | 3.93340800  | 1.54783400  | 2.05020900  |
| H  | 3.25815700  | 2.27983900  | 1.57779000  |
| C  | 4.63862800  | 1.89708800  | 3.21123600  |
| H  | 4.51730100  | 2.90369600  | 3.64037300  |
| C  | 5.48957600  | 0.96279600  | 3.82797800  |
| H  | 6.03664200  | 1.23614100  | 4.74353400  |
| C  | 5.63544800  | -0.32063900 | 3.27809300  |
| H  | 6.29757600  | -1.05693300 | 3.75944500  |
| C  | 4.93915600  | -0.67531300 | 2.10999800  |
| H  | 5.06241300  | -1.68308000 | 1.68572100  |
| C  | 3.96352300  | 0.77146700  | -1.39337300 |
| C  | 5.28833700  | 1.24125800  | -1.26973200 |
| H  | 5.84503200  | 1.09409800  | -0.33186700 |
| C  | 5.89937500  | 1.90294800  | -2.34768700 |
| H  | 6.93219100  | 2.27035900  | -2.24492100 |
| C  | 5.19754900  | 2.09643400  | -3.54869200 |
| H  | 5.67923300  | 2.61815200  | -4.39016300 |
| C  | 3.87737300  | 1.63013900  | -3.67326400 |
| H  | 3.32119800  | 1.78537200  | -4.61058500 |
| C  | 3.25768700  | 0.97449500  | -2.59913300 |
| Cl | -1.11658300 | 0.56446000  | -1.42650300 |
| C  | -0.87507700 | 0.91855000  | 2.29978300  |
| C  | 0.34174800  | 0.71333600  | 2.44122400  |
| H  | 1.29713100  | 0.63118800  | 2.95998500  |
| C  | -2.31462000 | 1.14042300  | 2.14404600  |
| H  | -2.82120800 | 0.16189700  | 1.98001200  |
| H  | -2.71873700 | 1.56559000  | 3.09004300  |
| N  | -2.64982800 | 2.08302000  | 1.09293800  |
| H  | -2.38128600 | 1.82097000  | 0.13581000  |
| C  | -3.27189800 | 3.26854900  | 1.37538200  |
| O  | -3.59812100 | 3.58275700  | 2.52912900  |
| C  | -3.55876700 | 4.18054900  | 0.20572200  |
| C  | -4.29465700 | 5.35279200  | 0.48163600  |
| C  | -3.13209100 | 3.93744500  | -1.11841200 |
| C  | -4.60495900 | 6.26070500  | -0.53955100 |
| H  | -4.61458000 | 5.52861800  | 1.51953400  |
| C  | -3.44226300 | 4.84822000  | -2.14036000 |

|   |             |             |             |
|---|-------------|-------------|-------------|
| H | -2.54910600 | 3.03894300  | -1.37640100 |
| C | -4.17900600 | 6.01013500  | -1.85543800 |
| H | -5.18200400 | 7.16983500  | -0.30889700 |
| H | -3.10318400 | 4.64705300  | -3.16839500 |
| H | -4.42055300 | 6.72143600  | -2.66071700 |
| H | 2.21770300  | 0.62275700  | -2.69358000 |
| C | -4.66044500 | -3.22813000 | 1.25729400  |
| C | -5.51344600 | -4.47147500 | 1.30362300  |
| C | -5.44844800 | -5.07861300 | 0.10160400  |
| C | -4.54883300 | -4.26631000 | -0.79781300 |
| N | -4.11895400 | -3.17630400 | -0.03112100 |
| H | -6.06670500 | -4.76490100 | 2.20619600  |
| H | -5.93464500 | -6.00182000 | -0.24201300 |
| O | -4.47247300 | -2.42213900 | 2.15839700  |
| O | -4.24792400 | -4.50002600 | -1.95852300 |
| I | -2.81716800 | -1.61824600 | -0.69698800 |

Table S9. Calculated Gibbs energy and XYZ coordinates for all atoms in **IM1** activated by C<sub>4</sub>H<sub>2</sub>INO<sub>2</sub>.

$G = -2803.3290$  Hartree

|    |            |             |             |
|----|------------|-------------|-------------|
| P  | 2.87185400 | -0.12931800 | -0.07639700 |
| C  | 2.79920600 | -1.57117800 | -1.21265900 |
| Au | 0.75863100 | 0.37512100  | 0.91159700  |
| C  | 3.61425600 | -1.65929000 | -2.36059400 |
| H  | 4.30794100 | -0.84275500 | -2.61290000 |
| C  | 3.53683300 | -2.79118000 | -3.18821400 |
| H  | 4.17211400 | -2.85318400 | -4.08533500 |
| C  | 2.65132300 | -3.83629900 | -2.87658200 |
| H  | 2.58984500 | -4.71945600 | -3.53126800 |
| C  | 1.83728300 | -3.75022900 | -1.73432300 |
| H  | 1.13469700 | -4.56227000 | -1.49180300 |
| C  | 1.90630300 | -2.62061100 | -0.90523300 |
| H  | 1.25708100 | -2.54768300 | -0.01772500 |
| C  | 4.13832000 | -0.55006500 | 1.19321900  |
| C  | 4.24392300 | 0.28134800  | 2.33072600  |
| H  | 3.57518800 | 1.15025600  | 2.44142900  |
| C  | 5.19955400 | 0.00466900  | 3.31940100  |
| H  | 5.27827000 | 0.66048700  | 4.20027100  |
| C  | 6.04593500 | -1.11054600 | 3.18983100  |
| H  | 6.78933000 | -1.33179200 | 3.97126300  |
| C  | 5.93784000 | -1.94381300 | 2.06508700  |
| H  | 6.59647400 | -2.81988900 | 1.96040800  |

|    |             |             |             |
|----|-------------|-------------|-------------|
| C  | 4.99016700  | -1.66621000 | 1.06533400  |
| H  | 4.91558500  | -2.32389700 | 0.18623700  |
| C  | 3.59666600  | 1.25216100  | -1.05525300 |
| C  | 4.94790800  | 1.63460100  | -0.92242000 |
| H  | 5.60729900  | 1.11013500  | -0.21460800 |
| C  | 5.45713800  | 2.69170000  | -1.69511200 |
| H  | 6.51254800  | 2.98541000  | -1.58471600 |
| C  | 4.62677100  | 3.36907400  | -2.60239600 |
| H  | 5.02881500  | 4.19824900  | -3.20505200 |
| C  | 3.28029100  | 2.98881500  | -2.73738300 |
| H  | 2.62386500  | 3.51741200  | -3.44585300 |
| C  | 2.76187300  | 1.93799700  | -1.96618000 |
| Cl | -0.63404900 | 0.52823100  | -1.35787300 |
| C  | -0.77884300 | 0.78368200  | 2.43449300  |
| C  | 0.33185600  | 0.53245100  | 2.99263000  |
| H  | 1.04759100  | 0.39126100  | 3.80555800  |
| C  | -2.21903500 | 1.07276200  | 2.25253300  |
| H  | -2.75706300 | 0.10479600  | 2.12524000  |
| H  | -2.61224000 | 1.56092200  | 3.16989100  |
| N  | -2.49697200 | 1.96927300  | 1.14812600  |
| H  | -2.19229600 | 1.66905600  | 0.21388400  |
| C  | -3.12255500 | 3.17043400  | 1.34821000  |
| O  | -3.50119900 | 3.53663400  | 2.47014700  |
| C  | -3.34804200 | 4.03242100  | 0.12824100  |
| C  | -4.12951900 | 5.19351800  | 0.31042200  |
| C  | -2.82175600 | 3.75661200  | -1.15302000 |
| C  | -4.38993500 | 6.05733300  | -0.76160100 |
| H  | -4.52504400 | 5.39626300  | 1.31687400  |
| C  | -3.08169300 | 4.62414800  | -2.22564000 |
| H  | -2.19437100 | 2.86977900  | -1.33762200 |
| C  | -3.86629400 | 5.77387900  | -2.03489900 |
| H  | -5.00442500 | 6.95751900  | -0.60429100 |
| H  | -2.66410600 | 4.39867300  | -3.21920000 |
| H  | -4.06846800 | 6.45057800  | -2.87988700 |
| H  | 1.70447200  | 1.64631200  | -2.07433300 |
| C  | -4.44164800 | -3.07062200 | 1.16338400  |
| C  | -5.32842700 | -4.29053200 | 1.20609800  |
| C  | -5.21587200 | -4.93993100 | 0.02999900  |
| C  | -4.24922100 | -4.17966000 | -0.84577500 |
| N  | -3.83388800 | -3.07363000 | -0.09476600 |
| H  | -5.93494000 | -4.53976900 | 2.08747200  |
| H  | -5.70667400 | -5.86262900 | -0.30842800 |
| O  | -4.27984500 | -2.24132700 | 2.04946500  |
| O  | -3.89158800 | -4.46159800 | -1.97955200 |



I            -2.44299700 -1.57249700 -0.73320400

Table S10. Calculated Gibbs energy and XYZ coordinates for all atoms in **TS2** activated by C<sub>4</sub>H<sub>2</sub>INO<sub>2</sub>.

G= -2803.3059 Hartree    Frequency = -260.32

|    |             |             |             |
|----|-------------|-------------|-------------|
| P  | 2.29634300  | -1.68481000 | -0.04930000 |
| C  | 3.42239900  | -0.24007500 | -0.18110700 |
| Au | 0.02553100  | -1.10177700 | -0.12569400 |
| C  | 4.73640000  | -0.27457900 | 0.33469900  |
| H  | 5.11098800  | -1.17660300 | 0.84292700  |
| C  | 5.56555400  | 0.85089800  | 0.20733400  |
| H  | 6.58948300  | 0.82070800  | 0.61118800  |
| C  | 5.08764900  | 2.01503200  | -0.41946200 |
| H  | 5.73743600  | 2.90032200  | -0.50188800 |
| C  | 3.77761600  | 2.05684600  | -0.92507500 |
| H  | 3.37768800  | 2.97477200  | -1.38320400 |
| C  | 2.94858000  | 0.92979900  | -0.81025000 |
| H  | 1.91537500  | 0.96595700  | -1.19180100 |
| C  | 2.75706000  | -2.83860400 | -1.41017900 |
| C  | 1.87323300  | -3.89973300 | -1.70830800 |
| H  | 0.93433900  | -4.00743800 | -1.14103200 |
| C  | 2.18521200  | -4.81208100 | -2.72683300 |
| H  | 1.49259800  | -5.63829300 | -2.95019400 |
| C  | 3.37155200  | -4.66434100 | -3.46678200 |
| H  | 3.61043300  | -5.37500000 | -4.27312800 |
| C  | 4.24663700  | -3.60429200 | -3.18111900 |
| H  | 5.17388900  | -3.48016400 | -3.76167200 |
| C  | 3.94555600  | -2.69330800 | -2.15439700 |
| H  | 4.63858800  | -1.86601900 | -1.93991500 |
| C  | 2.77905000  | -2.53649500 | 1.51214800  |
| C  | 3.49716000  | -3.74957200 | 1.51937500  |
| H  | 3.78861500  | -4.22941800 | 0.57291400  |
| C  | 3.84245700  | -4.35228600 | 2.74111300  |
| H  | 4.40258100  | -5.30026700 | 2.73979600  |
| C  | 3.47774000  | -3.74931200 | 3.95533700  |
| H  | 3.74927700  | -4.22481700 | 4.91066800  |
| C  | 2.76213500  | -2.53900700 | 3.94927000  |
| H  | 2.47192700  | -2.06277100 | 4.89870700  |
| C  | 2.40764100  | -1.93284900 | 2.73503700  |
| Cl | -0.07349300 | 0.88803600  | 2.08865600  |
| C  | -2.03649000 | -0.77811500 | -0.41794800 |
| C  | -2.19975500 | -1.65720600 | -1.32341900 |

|   |             |             |             |
|---|-------------|-------------|-------------|
| H | -2.10016100 | -2.45112200 | -2.06039100 |
| C | -2.98316500 | 0.19302600  | 0.22442400  |
| H | -2.61446900 | 0.50479900  | 1.21913900  |
| H | -3.00258100 | 1.10565800  | -0.41368900 |
| N | -4.31473000 | -0.37541900 | 0.35953300  |
| H | -4.74016900 | -0.31938700 | 1.28827000  |
| C | -4.92981600 | -1.14688800 | -0.57475600 |
| O | -4.39184200 | -1.45114700 | -1.66642100 |
| C | -6.30570200 | -1.64907900 | -0.24432300 |
| C | -6.76932500 | -2.79531200 | -0.92489600 |
| C | -7.15420800 | -1.00343200 | 0.68161700  |
| C | -8.04809800 | -3.30459500 | -0.66346200 |
| H | -6.10643600 | -3.27799900 | -1.65824700 |
| C | -8.43648300 | -1.51225900 | 0.93624500  |
| H | -6.82968600 | -0.08259400 | 1.19148400  |
| C | -8.88365900 | -2.66520100 | 0.26905800  |
| H | -8.39749600 | -4.20529700 | -1.19148000 |
| H | -9.09413600 | -0.99872900 | 1.65432800  |
| H | -9.89047800 | -3.06255700 | 0.47123600  |
| H | 1.83948800  | -0.98708100 | 2.73580100  |
| C | 0.92541900  | 5.52788400  | -1.32645000 |
| C | 0.53908500  | 6.90795100  | -1.80848000 |
| C | -0.55564300 | 7.30021800  | -1.12785800 |
| C | -0.93565400 | 6.19413700  | -0.17038400 |
| N | 0.00101700  | 5.17333300  | -0.34691900 |
| H | 1.10682300  | 7.43523300  | -2.58743600 |
| H | -1.12687900 | 8.23602400  | -1.19845500 |
| O | 1.86980800  | 4.85590500  | -1.72699200 |
| O | -1.88014400 | 6.18713800  | 0.60829200  |
| I | -0.02447500 | 3.26857400  | 0.74471600  |

Table S11. Calculated Gibbs energy and XYZ coordinates for all atoms in **IM2** activated by C<sub>4</sub>H<sub>2</sub>INO<sub>2</sub>.

$G = -2803.3322$  Hartree

|    |            |             |             |
|----|------------|-------------|-------------|
| P  | 3.03625300 | -0.50023200 | -0.09809500 |
| C  | 3.12017600 | 1.33446500  | -0.14862100 |
| Au | 0.85669000 | -1.36136800 | -0.26394000 |
| C  | 4.22781600 | 2.03970100  | 0.37174200  |
| H  | 5.06789100 | 1.49531100  | 0.83042300  |
| C  | 4.25257400 | 3.44178600  | 0.31518200  |
| H  | 5.11782800 | 3.98793000  | 0.72222100  |
| C  | 3.17240800 | 4.14589100  | -0.24530500 |

|    |             |             |             |
|----|-------------|-------------|-------------|
| H  | 3.19029900  | 5.24670600  | -0.27397100 |
| C  | 2.06252200  | 3.45015400  | -0.75299100 |
| H  | 1.19654600  | 3.99558400  | -1.16104700 |
| C  | 2.03826900  | 2.04674200  | -0.70706700 |
| H  | 1.16276200  | 1.49714200  | -1.08928400 |
| C  | 4.13783400  | -1.12763300 | -1.43516400 |
| C  | 4.01707300  | -2.48815400 | -1.79782100 |
| H  | 3.27607500  | -3.12699000 | -1.28987900 |
| C  | 4.83307200  | -3.02548500 | -2.80451600 |
| H  | 4.73434800  | -4.08740700 | -3.07813300 |
| C  | 5.76396400  | -2.20771100 | -3.46835100 |
| H  | 6.39801700  | -2.62795700 | -4.26447400 |
| C  | 5.87788700  | -0.85213500 | -3.12009900 |
| H  | 6.60055700  | -0.20576100 | -3.64194200 |
| C  | 5.07054400  | -0.31033200 | -2.10577300 |
| H  | 5.16739500  | 0.75370700  | -1.84280200 |
| C  | 3.86023000  | -0.96076000 | 1.48705600  |
| C  | 5.11642500  | -1.59751200 | 1.53779400  |
| H  | 5.65620900  | -1.83649300 | 0.60892900  |
| C  | 5.68497400  | -1.93062300 | 2.77951100  |
| H  | 6.66673900  | -2.42827000 | 2.81132100  |
| C  | 5.00744900  | -1.62950700 | 3.97149900  |
| H  | 5.45564200  | -1.89186400 | 4.94245800  |
| C  | 3.75400900  | -0.99377900 | 3.92314400  |
| H  | 3.21732800  | -0.75575900 | 4.85465700  |
| C  | 3.17673900  | -0.66380100 | 2.68833100  |
| Cl | -0.95734600 | 1.02501400  | 2.53317000  |
| C  | -1.05524400 | -2.11494600 | -0.38590700 |
| C  | -1.31266500 | -3.38722500 | -0.72871600 |
| H  | -0.61142100 | -4.18271700 | -1.00912300 |
| C  | -2.21725700 | -1.21188600 | -0.05547200 |
| H  | -2.04029300 | -0.65202700 | 0.88953400  |
| H  | -2.36821300 | -0.44451100 | -0.84799300 |
| N  | -3.46719600 | -1.98471900 | 0.09899900  |
| H  | -4.25670700 | -1.51176500 | 0.55478600  |
| C  | -3.64473500 | -3.22914900 | -0.29528100 |
| O  | -2.64410100 | -3.93117100 | -0.78241200 |
| C  | -4.93813600 | -3.92467100 | -0.20681100 |
| C  | -4.95696600 | -5.33945100 | -0.22043400 |
| C  | -6.15460700 | -3.20712000 | -0.12052300 |
| C  | -6.17540300 | -6.02207200 | -0.13042500 |
| H  | -4.01144600 | -5.89569500 | -0.28872700 |
| C  | -7.36771100 | -3.89965100 | -0.03263800 |
| H  | -6.16489000 | -2.10659600 | -0.15037400 |

|   |             |             |             |
|---|-------------|-------------|-------------|
| C | -7.38059600 | -5.30536900 | -0.03444300 |
| H | -6.18464100 | -7.12244700 | -0.13264300 |
| H | -8.31138800 | -3.33708100 | 0.02690800  |
| H | -8.33743700 | -5.84539800 | 0.03431200  |
| H | 2.19302400  | -0.16696200 | 2.65967700  |
| C | -2.02015100 | 5.17031300  | -1.43313600 |
| C | -2.98762100 | 6.12168600  | -2.10429500 |
| C | -4.19560200 | 5.96006900  | -1.53045400 |
| C | -4.06544600 | 4.89637800  | -0.46189400 |
| N | -2.73594100 | 4.47742700  | -0.46495800 |
| H | -2.67936500 | 6.79654700  | -2.91481500 |
| H | -5.14690900 | 6.46735800  | -1.74290800 |
| O | -0.82939500 | 5.04423900  | -1.70681500 |
| O | -4.95956900 | 4.47949000  | 0.26553200  |
| I | -1.91056400 | 2.91232100  | 0.90404300  |

Table S12. Calculated Gibbs energy and XYZ coordinates for all atoms in **TS2'** activated by  $C_4H_2INO_2$ .

|                                                 |            |             |             |
|-------------------------------------------------|------------|-------------|-------------|
| $G = -2803.3180$ Hartree    Frequency = -129.08 |            |             |             |
| P                                               | 3.00006700 | -0.50156100 | 0.18645700  |
| C                                               | 3.49792100 | 0.94580100  | -0.83056400 |
| Au                                              | 1.42828800 | -1.81853300 | -0.90500400 |
| C                                               | 2.86366300 | 2.19224700  | -0.64691500 |
| H                                               | 2.10914800 | 2.33432300  | 0.14113100  |
| C                                               | 3.17823600 | 3.26960000  | -1.49107200 |
| H                                               | 2.66226600 | 4.22886100  | -1.33498800 |
| C                                               | 4.12307100 | 3.11256900  | -2.51742000 |
| H                                               | 4.37097500 | 3.96024200  | -3.17501000 |
| C                                               | 4.74679700 | 1.86730500  | -2.71035500 |
| H                                               | 5.48303900 | 1.73596000  | -3.51846000 |
| C                                               | 4.43197000 | 0.78238200  | -1.87840300 |
| H                                               | 4.91872800 | -0.19106500 | -2.04572600 |
| C                                               | 4.52629800 | -1.42525400 | 0.62164600  |
| C                                               | 4.41603000 | -2.81358900 | 0.85356600  |
| H                                               | 3.44177100 | -3.31319700 | 0.72461500  |
| C                                               | 5.54235200 | -3.55403100 | 1.24333900  |
| H                                               | 5.44853300 | -4.63629200 | 1.42161700  |
| C                                               | 6.78480800 | -2.91664600 | 1.39756200  |
| H                                               | 7.66947600 | -3.49933500 | 1.69778700  |
| C                                               | 6.89983400 | -1.53634400 | 1.16244600  |
| H                                               | 7.87273200 | -1.03450100 | 1.27925500  |
| C                                               | 5.77661700 | -0.78782000 | 0.77611400  |
| H                                               | 5.87957100 | 0.29193000  | 0.58980300  |

|    |             |             |             |
|----|-------------|-------------|-------------|
| C  | 2.31514600  | 0.17224000  | 1.75564900  |
| C  | 3.14916500  | 0.79545100  | 2.71003300  |
| H  | 4.23312600  | 0.87932100  | 2.53820200  |
| C  | 2.59379500  | 1.31146900  | 3.89031100  |
| H  | 3.24843400  | 1.79406100  | 4.63244700  |
| C  | 1.21057700  | 1.21511400  | 4.12601200  |
| H  | 0.78108600  | 1.62408000  | 5.05372100  |
| C  | 0.37811500  | 0.59930800  | 3.17856400  |
| H  | -0.70845800 | 0.52209800  | 3.34002500  |
| C  | 0.92955100  | 0.07483600  | 1.99853600  |
| Cl | -3.29429700 | 0.15842200  | 1.80652900  |
| C  | -1.02965700 | -2.39146300 | -1.76252600 |
| C  | 0.02197600  | -3.09716800 | -1.85000300 |
| H  | 0.32162000  | -4.10049200 | -2.17593500 |
| C  | -1.94866900 | -1.26427600 | -1.55636200 |
| H  | -1.42156200 | -0.44640800 | -1.02436500 |
| H  | -2.24585600 | -0.86203100 | -2.55304000 |
| N  | -3.10450900 | -1.67412600 | -0.78577500 |
| H  | -3.35396200 | -1.11932000 | 0.06192100  |
| C  | -3.57745500 | -2.90783200 | -1.08063000 |
| O  | -2.97079600 | -3.58946200 | -1.94519000 |
| C  | -4.79635300 | -3.41830500 | -0.38542900 |
| C  | -5.17652000 | -4.75699400 | -0.62388800 |
| C  | -5.57739800 | -2.61621500 | 0.47664100  |
| C  | -6.31594900 | -5.28947800 | -0.00711800 |
| H  | -4.55951400 | -5.36708000 | -1.30013700 |
| C  | -6.71566100 | -3.15528200 | 1.09332800  |
| H  | -5.30318700 | -1.56898200 | 0.67961600  |
| C  | -7.08774400 | -4.48916200 | 0.85314700  |
| H  | -6.60459800 | -6.33478800 | -0.19711200 |
| H  | -7.31880900 | -2.52556600 | 1.76525800  |
| H  | -7.98394100 | -4.90632400 | 1.33836700  |
| H  | 0.27467000  | -0.41365600 | 1.25919800  |
| C  | -2.95747400 | 5.34892700  | -0.81939800 |
| C  | -2.14530200 | 6.50674800  | -1.35399800 |
| C  | -0.84156400 | 6.23121700  | -1.15404900 |
| C  | -0.74365100 | 4.88162700  | -0.47984100 |
| N  | -2.04534100 | 4.41910900  | -0.31552800 |
| H  | -2.61286800 | 7.38836100  | -1.81355000 |
| H  | 0.04641300  | 6.82781800  | -1.40495400 |
| O  | -4.17680700 | 5.24166300  | -0.82489300 |
| O  | 0.28731700  | 4.30592300  | -0.14419300 |
| I  | -2.61104600 | 2.50989800  | 0.62448200  |

Table S13. Calculated Gibbs energy and XYZ coordinates for all atoms in **IM2'** activated by C<sub>4</sub>H<sub>2</sub>INO<sub>2</sub>.

$G = -2803.3439$  Hartree

|    |             |             |             |
|----|-------------|-------------|-------------|
| P  | 3.41091500  | -0.37299100 | 0.08249200  |
| C  | 3.75039100  | 0.84473300  | -1.25709600 |
| Au | 1.43432700  | -1.60014000 | -0.25607300 |
| C  | 4.35271500  | 2.09530200  | -1.00542700 |
| H  | 4.62519600  | 2.38298100  | 0.02161900  |
| C  | 4.60098100  | 2.98086900  | -2.06749300 |
| H  | 5.07011300  | 3.95618900  | -1.86455300 |
| C  | 4.25242400  | 2.62506600  | -3.38135700 |
| H  | 4.44594000  | 3.32289400  | -4.21085200 |
| C  | 3.65079200  | 1.38030300  | -3.63503200 |
| H  | 3.36940500  | 1.10039600  | -4.66198700 |
| C  | 3.39538600  | 0.49371300  | -2.57785300 |
| H  | 2.90792200  | -0.47526500 | -2.77375500 |
| C  | 4.91437000  | -1.43172200 | 0.18653500  |
| C  | 4.78453100  | -2.70805800 | 0.77714100  |
| H  | 3.79933900  | -3.04532100 | 1.13884500  |
| C  | 5.90324400  | -3.54683500 | 0.89623300  |
| H  | 5.79352000  | -4.54037700 | 1.35780100  |
| C  | 7.15496200  | -3.12371000 | 0.41753900  |
| H  | 8.03041700  | -3.78604400 | 0.50327900  |
| C  | 7.28653600  | -1.85818100 | -0.17802300 |
| H  | 8.26461900  | -1.52530300 | -0.55869300 |
| C  | 6.17217300  | -1.01103800 | -0.29368400 |
| H  | 6.28490200  | -0.02197700 | -0.76348900 |
| C  | 3.38140400  | 0.61144100  | 1.63978200  |
| C  | 4.43266000  | 0.58102000  | 2.57822300  |
| H  | 5.32491100  | -0.03591100 | 2.39253200  |
| C  | 4.34209900  | 1.33918800  | 3.75818500  |
| H  | 5.16619200  | 1.30898800  | 4.48792300  |
| C  | 3.20857400  | 2.12975400  | 4.00586900  |
| H  | 3.14021700  | 2.72088600  | 4.93234400  |
| C  | 2.15905900  | 2.16206000  | 3.07061800  |
| H  | 1.26648400  | 2.77823500  | 3.26092600  |
| C  | 2.23795500  | 1.40322300  | 1.89332800  |
| Cl | -5.42300700 | 0.77916200  | 1.84316700  |
| C  | -1.50064100 | -2.30416100 | -0.14539800 |
| C  | -0.28665100 | -2.65561400 | -0.59057500 |
| H  | -0.26477000 | -3.56776400 | -1.21715300 |
| C  | -2.01186000 | -1.16641900 | 0.71524500  |

|   |             |             |             |
|---|-------------|-------------|-------------|
| H | -1.66168000 | -1.23007500 | 1.76864700  |
| H | -1.73059400 | -0.16332500 | 0.32607600  |
| N | -3.45991500 | -1.37297800 | 0.65158000  |
| H | -4.15932300 | -0.73091800 | 1.11442000  |
| C | -3.75107500 | -2.45343000 | -0.04365800 |
| O | -2.67532500 | -3.07020600 | -0.51078900 |
| C | -5.07228200 | -3.00040000 | -0.33838100 |
| C | -5.16907600 | -4.27131900 | -0.95413400 |
| C | -6.24395600 | -2.27093400 | -0.02509300 |
| C | -6.42849700 | -4.80843000 | -1.24219900 |
| H | -4.25519100 | -4.83165200 | -1.19787900 |
| C | -7.49689700 | -2.81914200 | -0.32174400 |
| H | -6.17576900 | -1.27247600 | 0.43860000  |
| C | -7.59202100 | -4.08505500 | -0.92646600 |
| H | -6.50412200 | -5.79827000 | -1.71684700 |
| H | -8.40808700 | -2.25077900 | -0.08171200 |
| H | -8.58131500 | -4.51032900 | -1.15603500 |
| H | 1.41004900  | 1.43318200  | 1.16518100  |
| C | -2.17932900 | 4.79339100  | -1.04568700 |
| C | -0.82594500 | 5.11022100  | -1.64311500 |
| C | -0.02661200 | 4.03920800  | -1.46686500 |
| C | -0.82477800 | 2.97485100  | -0.75200400 |
| N | -2.09376900 | 3.49467300  | -0.53708900 |
| H | -0.60869600 | 6.07428600  | -2.12320400 |
| H | 1.02024700  | 3.88790700  | -1.76439000 |
| O | -3.15933200 | 5.52438800  | -1.00954700 |
| O | -0.42849300 | 1.85818800  | -0.41894200 |
| I | -3.66598500 | 2.37603500  | 0.51451300  |

Table S14. Calculated Gibbs energy and XYZ coordinates for all atoms in **COM1a** activated by  $C_4H_2INO_2$ .

$G = -2803.3360$  Hartree

|    |            |             |             |
|----|------------|-------------|-------------|
| P  | 2.60480100 | -0.10790400 | 0.10293000  |
| C  | 3.98764300 | -1.27819800 | -0.21541800 |
| Au | 0.73392400 | -0.85370500 | -1.01314100 |
| C  | 5.33378900 | -0.85915700 | -0.15712800 |
| H  | 5.58243700 | 0.19072900  | 0.06045400  |
| C  | 6.36337500 | -1.78513200 | -0.38587900 |
| H  | 7.41205200 | -1.45281000 | -0.34349600 |
| C  | 6.05899000 | -3.12706500 | -0.67154400 |
| H  | 6.87048800 | -3.84867000 | -0.85324800 |
| C  | 4.71972500 | -3.54624800 | -0.73202500 |
| H  | 4.47616100 | -4.59514200 | -0.96069500 |

|    |             |             |             |
|----|-------------|-------------|-------------|
| C  | 3.68411400  | -2.62521300 | -0.50916700 |
| H  | 2.63188200  | -2.95032900 | -0.56516600 |
| C  | 2.41013500  | -0.01229400 | 1.92753300  |
| C  | 1.58681900  | 0.99406200  | 2.48175100  |
| H  | 1.09595700  | 1.74179400  | 1.83936600  |
| C  | 1.39084600  | 1.04884000  | 3.86957600  |
| H  | 0.74986400  | 1.83847900  | 4.29115400  |
| C  | 2.00324500  | 0.10486300  | 4.71174700  |
| H  | 1.84343900  | 0.15079600  | 5.80011700  |
| C  | 2.81998100  | -0.89625500 | 4.16213000  |
| H  | 3.30581900  | -1.63656100 | 4.81637800  |
| C  | 3.02621600  | -0.95838800 | 2.77370900  |
| H  | 3.67128000  | -1.74466500 | 2.35347800  |
| C  | 3.17213500  | 1.54257400  | -0.46116700 |
| C  | 3.89134600  | 2.40955600  | 0.38932900  |
| H  | 4.08799300  | 2.12906500  | 1.43516400  |
| C  | 4.35290200  | 3.64220000  | -0.09997700 |
| H  | 4.90990400  | 4.31730700  | 0.56782500  |
| C  | 4.10283100  | 4.01362000  | -1.43130500 |
| H  | 4.46334900  | 4.98294300  | -1.80905000 |
| C  | 3.38583100  | 3.15206400  | -2.27882300 |
| H  | 3.18125100  | 3.44269900  | -3.32065700 |
| C  | 2.91718000  | 1.92092300  | -1.79688500 |
| Cl | -1.08759800 | -1.69336500 | -2.25816900 |
| C  | -0.76788700 | -3.96857000 | 1.14056200  |
| C  | 0.20061500  | -3.55559300 | 1.76617700  |
| H  | 1.04607600  | -3.18797500 | 2.33712800  |
| C  | -1.92435500 | -4.44889400 | 0.37359700  |
| H  | -1.56775400 | -4.94317200 | -0.55699400 |
| H  | -2.47711200 | -5.21120000 | 0.96336600  |
| N  | -2.87878600 | -3.40180100 | 0.05111100  |
| H  | -2.57729200 | -2.69492700 | -0.63185500 |
| C  | -4.12506900 | -3.37660400 | 0.61599900  |
| O  | -4.51809500 | -4.26247200 | 1.38900900  |
| C  | -5.01510100 | -2.21365400 | 0.24616200  |
| C  | -6.37168100 | -2.30190300 | 0.62582600  |
| C  | -4.56367300 | -1.04728000 | -0.40850100 |
| C  | -7.26153600 | -1.25595800 | 0.34689700  |
| H  | -6.70470200 | -3.21119300 | 1.14828900  |
| C  | -5.45219200 | 0.00582300  | -0.67823400 |
| H  | -3.51088200 | -0.93375400 | -0.70989200 |
| C  | -6.80267500 | -0.09733900 | -0.30432500 |
| H  | -8.31867000 | -1.34115300 | 0.64375200  |
| H  | -5.07830000 | 0.91777100  | -1.16965500 |



|   |             |            |             |
|---|-------------|------------|-------------|
| H | -7.49799600 | 0.72996200 | -0.51683700 |
| H | 2.34269400  | 1.25033100 | -2.45607800 |
| I | -1.07883000 | 1.53014100 | -0.45226400 |
| N | -2.07417100 | 3.29495500 | 0.19841100  |
| C | -3.28784300 | 3.77768300 | -0.30910800 |
| C | -1.58299400 | 4.12876600 | 1.21063900  |
| C | -3.57641200 | 5.04573300 | 0.45483200  |
| C | -2.58236300 | 5.24941700 | 1.34311100  |
| H | -4.47562500 | 5.64646200 | 0.26217000  |
| H | -2.45143200 | 6.06152700 | 2.07104100  |
| O | -0.55311300 | 3.96751400 | 1.84896000  |
| O | -3.96487100 | 3.26450200 | -1.18674800 |

Table S15. Calculated Gibbs energy and XYZ coordinates for all atoms in **TS1a** activated by C<sub>4</sub>H<sub>2</sub>INO<sub>2</sub>.

$G = -2803.3180$  Hartree    Frequency = -49.47

|    |            |             |             |
|----|------------|-------------|-------------|
| P  | 2.68261600 | 0.13993900  | -0.09533400 |
| C  | 4.08567100 | -0.77143400 | -0.85896000 |
| Au | 0.84173700 | -1.29932100 | 0.07863000  |
| C  | 5.02971500 | -0.12467600 | -1.68422400 |
| H  | 4.93315500 | 0.94999600  | -1.90189900 |
| C  | 6.09505200 | -0.85617000 | -2.23376900 |
| H  | 6.82697300 | -0.34781000 | -2.88042800 |
| C  | 6.22553300 | -2.22864100 | -1.96356500 |
| H  | 7.06018800 | -2.79865500 | -2.40030700 |
| C  | 5.28572400 | -2.87555100 | -1.14292600 |
| H  | 5.37983200 | -3.95249500 | -0.93489000 |
| C  | 4.21547400 | -2.15240800 | -0.59505700 |
| H  | 3.46709100 | -2.66095900 | 0.03549200  |
| C  | 3.30808700 | 0.75524900  | 1.52298100  |
| C  | 2.38896900 | 1.36513500  | 2.40689700  |
| H  | 1.33150800 | 1.47289300  | 2.11439300  |
| C  | 2.82070700 | 1.83994100  | 3.65425500  |
| H  | 2.09872200 | 2.31828900  | 4.33403300  |
| C  | 4.16624900 | 1.69803300  | 4.03668400  |
| H  | 4.50164700 | 2.06370200  | 5.01957000  |
| C  | 5.07992300 | 1.08492800  | 3.16467400  |
| H  | 6.13446400 | 0.96975000  | 3.45961800  |
| C  | 4.65720400 | 0.61521200  | 1.90964500  |
| H  | 5.38287900 | 0.13975500  | 1.23300300  |
| C  | 2.42607100 | 1.63008700  | -1.14041100 |
| C  | 2.92224800 | 2.89776900  | -0.77198800 |

|    |             |             |             |
|----|-------------|-------------|-------------|
| H  | 3.47685600  | 3.02607000  | 0.16968500  |
| C  | 2.70209400  | 4.00539800  | -1.60764000 |
| H  | 3.08643600  | 4.99378700  | -1.31154800 |
| C  | 1.99374400  | 3.85452100  | -2.81039000 |
| H  | 1.81733600  | 4.72631100  | -3.45931100 |
| C  | 1.50233700  | 2.59077500  | -3.18126500 |
| H  | 0.94094000  | 2.46850300  | -4.12028700 |
| C  | 1.71081000  | 1.48150200  | -2.34928700 |
| Cl | -0.36067100 | -2.54005000 | -1.75496200 |
| C  | -0.53408400 | -2.52135300 | 1.91184100  |
| C  | 0.38012700  | -1.76005200 | 2.28382900  |
| H  | 1.02849300  | -1.20576900 | 2.96289600  |
| C  | -1.62467100 | -3.44333900 | 1.56587900  |
| H  | -1.18642400 | -4.40931200 | 1.22954100  |
| H  | -2.22572600 | -3.64721600 | 2.47959600  |
| N  | -2.53215000 | -2.91728900 | 0.56697200  |
| H  | -2.11764900 | -2.75665800 | -0.36580300 |
| C  | -3.81970500 | -2.58082700 | 0.87960500  |
| O  | -4.29716200 | -2.76648200 | 2.00861700  |
| C  | -4.64804600 | -1.98289400 | -0.23379800 |
| C  | -6.00470200 | -1.72281300 | 0.05386500  |
| C  | -4.14563600 | -1.66138400 | -1.51419800 |
| C  | -6.84792200 | -1.16373800 | -0.91567800 |
| H  | -6.37470900 | -1.97104700 | 1.05984300  |
| C  | -4.99140300 | -1.10017700 | -2.48397500 |
| H  | -3.08862200 | -1.83447100 | -1.77424700 |
| C  | -6.34261100 | -0.85130100 | -2.18967200 |
| H  | -7.90530200 | -0.96884800 | -0.67734700 |
| H  | -4.58775700 | -0.85243300 | -3.47806500 |
| H  | -7.00208800 | -0.41122000 | -2.95415500 |
| H  | 1.30837800  | 0.49681200  | -2.63599500 |
| I  | -1.23960100 | 1.12870100  | 0.31592700  |
| N  | -2.81597000 | 2.52055700  | 0.38332100  |
| C  | -2.84301100 | 3.72742200  | -0.33433300 |
| C  | -4.00986700 | 2.32475700  | 1.09848600  |
| C  | -4.17612800 | 4.35505100  | -0.01875400 |
| C  | -4.85467800 | 3.53927600  | 0.81361500  |
| H  | -4.47308800 | 5.32474100  | -0.44086600 |
| H  | -5.85375100 | 3.66435700  | 1.25272000  |
| O  | -4.28520000 | 1.36595500  | 1.79974400  |
| O  | -1.96123800 | 4.16005400  | -1.05748200 |

Table S16. Calculated Gibbs energy and XYZ coordinates for all atoms in **IM1a** activated by C<sub>4</sub>H<sub>2</sub>INO<sub>2</sub>.

$G = -2803.3233$  Hartree

|    |             |             |             |
|----|-------------|-------------|-------------|
| P  | -2.62278000 | 0.08532800  | 0.23660200  |
| C  | -3.92287300 | -1.00251400 | 0.94906000  |
| Au | -0.84984600 | -1.21548300 | -0.73470000 |
| C  | -4.62703000 | -0.66426400 | 2.12332400  |
| H  | -4.39447700 | 0.26817200  | 2.66009900  |
| C  | -5.62599900 | -1.52216500 | 2.61230400  |
| H  | -6.17054000 | -1.25480800 | 3.53117200  |
| C  | -5.92821600 | -2.71520000 | 1.93520500  |
| H  | -6.70991800 | -3.38632900 | 2.32370200  |
| C  | -5.22634400 | -3.05621200 | 0.76620400  |
| H  | -5.45436000 | -3.99406100 | 0.23652000  |
| C  | -4.22287000 | -2.20725000 | 0.27611100  |
| H  | -3.66203700 | -2.48195700 | -0.63236400 |
| C  | -3.49250300 | 1.15141600  | -0.98937000 |
| C  | -2.71398100 | 1.86808800  | -1.92500500 |
| H  | -1.61590500 | 1.77302800  | -1.91572300 |
| C  | -3.33431100 | 2.70420800  | -2.86547500 |
| H  | -2.71878400 | 3.26263000  | -3.58765500 |
| C  | -4.73492100 | 2.82077600  | -2.89048500 |
| H  | -5.22098400 | 3.47032500  | -3.63492600 |
| C  | -5.51297700 | 2.10306000  | -1.96777000 |
| H  | -6.61059000 | 2.18855300  | -1.98496400 |
| C  | -4.89761800 | 1.27226300  | -1.01643600 |
| H  | -5.51660300 | 0.71633800  | -0.29613600 |
| C  | -2.10654400 | 1.21614400  | 1.59353000  |
| C  | -2.52189900 | 2.56297900  | 1.64386800  |
| H  | -3.17999900 | 2.97194200  | 0.86257700  |
| C  | -2.08982100 | 3.39104100  | 2.69319000  |
| H  | -2.41361800 | 4.44294000  | 2.72327100  |
| C  | -1.24918100 | 2.88178000  | 3.69577000  |
| H  | -0.91069400 | 3.53435100  | 4.51559200  |
| C  | -0.83482300 | 1.53946100  | 3.64697800  |
| H  | -0.16956400 | 1.13710600  | 4.42677500  |
| C  | -1.25364800 | 0.70646500  | 2.59890700  |
| Cl | -0.08521100 | -2.51071900 | 1.32162600  |
| C  | 0.43973300  | -2.02510800 | -2.29291200 |
| C  | -0.38762700 | -1.21307100 | -2.81914000 |
| H  | -0.84914200 | -0.64264500 | -3.62886600 |
| C  | 1.53308900  | -3.01528500 | -2.14880000 |
| H  | 1.08569500  | -4.03452600 | -2.18180600 |

|   |             |             |             |
|---|-------------|-------------|-------------|
| H | 2.23239200  | -2.92652700 | -3.00759600 |
| N | 2.31506800  | -2.83128700 | -0.94296800 |
| H | 1.79472400  | -2.85050700 | -0.05126600 |
| C | 3.64686400  | -2.51956700 | -1.00481700 |
| O | 4.26348500  | -2.46998100 | -2.07915000 |
| C | 4.34550900  | -2.26214900 | 0.30951100  |
| C | 5.74968500  | -2.12880300 | 0.26676500  |
| C | 3.68204100  | -2.12833100 | 1.54908100  |
| C | 6.48143000  | -1.88386700 | 1.43637300  |
| H | 6.24773100  | -2.22146500 | -0.70984700 |
| C | 4.41677900  | -1.87988900 | 2.71930400  |
| H | 2.58399100  | -2.19974400 | 1.62090600  |
| C | 5.81573400  | -1.76035400 | 2.66832800  |
| H | 7.57729900  | -1.78603600 | 1.38800400  |
| H | 3.88795600  | -1.77418400 | 3.67942300  |
| H | 6.38734300  | -1.56639300 | 3.58958300  |
| H | -0.90576600 | -0.33926900 | 2.54943100  |
| I | 1.47351600  | 1.23655700  | -0.68554400 |
| N | 2.90240500  | 2.70379000  | -0.27492800 |
| C | 2.61059700  | 3.97204200  | 0.25630400  |
| C | 4.28821900  | 2.52204800  | -0.43770600 |
| C | 3.94376900  | 4.65182800  | 0.42609000  |
| C | 4.91764300  | 3.81011700  | 0.02350300  |
| H | 4.02497700  | 5.67326600  | 0.82177400  |
| H | 6.00537000  | 3.96149400  | 0.00339900  |
| O | 4.84084200  | 1.52294800  | -0.86381300 |
| O | 1.50286500  | 4.40960800  | 0.51694800  |

Table S17. Calculated Gibbs energy and XYZ coordinates for all atoms in **TS2a** activated by  $C_4H_2INO_2$ .

$G = -2803.2985$ Hartree    Frequency = -229.85

|    |             |             |             |
|----|-------------|-------------|-------------|
| P  | -2.44270600 | -0.65532900 | -0.03366100 |
| C  | -3.49182300 | -2.16171000 | -0.21035000 |
| Au | -0.12583700 | -1.19506700 | -0.10374600 |
| C  | -4.72190900 | -2.29981900 | 0.46498700  |
| H  | -5.05459800 | -1.53518300 | 1.18293500  |
| C  | -5.52984300 | -3.42395600 | 0.22577200  |
| H  | -6.48643300 | -3.52841200 | 0.76093200  |
| C  | -5.12165100 | -4.40757700 | -0.68952600 |
| H  | -5.75727700 | -5.28761900 | -0.87369900 |
| C  | -3.89900800 | -4.26807500 | -1.36834800 |
| H  | -3.57218900 | -5.03739800 | -2.08489600 |

|    |             |             |             |
|----|-------------|-------------|-------------|
| C  | -3.08364600 | -3.15237200 | -1.12828000 |
| H  | -2.12324000 | -3.04869500 | -1.65726800 |
| C  | -3.11039100 | 0.43134800  | -1.36398100 |
| C  | -2.35033600 | 0.65122500  | -2.53020100 |
| H  | -1.33008700 | 0.24237300  | -2.60108400 |
| C  | -2.88954900 | 1.39238200  | -3.59398800 |
| H  | -2.28849400 | 1.56024600  | -4.50091900 |
| C  | -4.18620300 | 1.92195200  | -3.49713200 |
| H  | -4.60602000 | 2.50864400  | -4.32897600 |
| C  | -4.94957300 | 1.70072500  | -2.33778400 |
| H  | -5.96835500 | 2.11070700  | -2.25912300 |
| C  | -4.42061900 | 0.95155400  | -1.27597700 |
| H  | -5.03360200 | 0.77188100  | -0.37941100 |
| C  | -2.85076600 | 0.09803000  | 1.58755700  |
| C  | -3.05873000 | 1.48645500  | 1.72837000  |
| H  | -3.02695400 | 2.15504200  | 0.85587500  |
| C  | -3.27542400 | 2.03393500  | 3.00387300  |
| H  | -3.43183200 | 3.11914300  | 3.10358500  |
| C  | -3.28059200 | 1.20867500  | 4.13961100  |
| H  | -3.45341500 | 1.64267600  | 5.13679600  |
| C  | -3.04839300 | -0.17103600 | 4.00279100  |
| H  | -3.03226600 | -0.82095200 | 4.89146700  |
| C  | -2.82529300 | -0.72846100 | 2.73498900  |
| Cl | -0.41372400 | -3.29269700 | 1.36346000  |
| C  | 1.93582400  | -1.62909100 | -0.35935900 |
| C  | 2.20351900  | -0.85920500 | -1.33641300 |
| H  | 2.24891000  | -0.12987500 | -2.14129800 |
| C  | 2.75099500  | -2.66767400 | 0.35910300  |
| H  | 2.32380900  | -2.89420000 | 1.35211400  |
| H  | 2.68053000  | -3.60412600 | -0.23911200 |
| N  | 4.13450900  | -2.25101600 | 0.50233000  |
| H  | 4.51197500  | -2.22548800 | 1.45297300  |
| C  | 4.86141600  | -1.68046800 | -0.49563000 |
| O  | 4.38213200  | -1.46383200 | -1.63266300 |
| C  | 6.27957600  | -1.30274000 | -0.17998600 |
| C  | 6.89343800  | -0.32034700 | -0.98616800 |
| C  | 7.02294200  | -1.91279100 | 0.85422200  |
| C  | 8.21872700  | 0.06533800  | -0.74571800 |
| H  | 6.30936500  | 0.13549500  | -1.79931000 |
| C  | 8.35176100  | -1.52890300 | 1.08819500  |
| H  | 6.57706900  | -2.71133000 | 1.46778400  |
| C  | 8.95017400  | -0.53701200 | 0.29287600  |
| H  | 8.68594100  | 0.84036400  | -1.37274600 |
| H  | 8.92618400  | -2.01456100 | 1.89197500  |

|   |             |             |             |
|---|-------------|-------------|-------------|
| H | 9.99315200  | -0.23705400 | 0.47919500  |
| H | -2.60281900 | -1.80277000 | 2.63542800  |
| C | 1.70594500  | 4.66314900  | 0.10271800  |
| C | 1.34354700  | 6.10496700  | 0.38069300  |
| C | 0.00839300  | 6.17852700  | 0.55036300  |
| C | -0.56652600 | 4.78860900  | 0.39083900  |
| N | 0.50921300  | 3.94573500  | 0.12245200  |
| H | 2.09989600  | 6.90106500  | 0.42136600  |
| H | -0.62327500 | 7.05095800  | 0.76760100  |
| O | 2.82465500  | 4.21063100  | -0.10094800 |
| O | -1.74755600 | 4.47216700  | 0.47987400  |
| I | 0.34477900  | 1.74880400  | -0.18551700 |

Table S18. Calculated Gibbs energy and XYZ coordinates for all atoms in **IM2a** activated by C<sub>4</sub>H<sub>2</sub>INO<sub>2</sub>.

$G = -2803.3269$  Hartree

|    |             |             |             |
|----|-------------|-------------|-------------|
| P  | -2.33023500 | -0.99192500 | -0.04741300 |
| C  | -3.20401900 | -2.59771900 | -0.31075900 |
| Au | 0.08907900  | -1.00894000 | -0.02281500 |
| C  | -4.47318400 | -2.84733400 | 0.25487200  |
| H  | -4.93063200 | -2.11976400 | 0.94210400  |
| C  | -5.16166100 | -4.03070500 | -0.05677300 |
| H  | -6.14912200 | -4.21889000 | 0.39269800  |
| C  | -4.59587400 | -4.96645400 | -0.93874700 |
| H  | -5.13843100 | -5.89334500 | -1.18202200 |
| C  | -3.33594600 | -4.71773200 | -1.50746600 |
| H  | -2.88522900 | -5.44968900 | -2.19558600 |
| C  | -2.63758800 | -3.54100800 | -1.19371300 |
| H  | -1.64038600 | -3.36356100 | -1.62145200 |
| C  | -3.08009900 | 0.05401100  | -1.36594800 |
| C  | -2.33501100 | 0.30148000  | -2.53736300 |
| H  | -1.29613800 | -0.05750700 | -2.60918800 |
| C  | -2.91325200 | 1.00601400  | -3.60504000 |
| H  | -2.32394200 | 1.19640700  | -4.51525400 |
| C  | -4.23381400 | 1.47347400  | -3.50687300 |
| H  | -4.68429900 | 2.03333300  | -4.34118800 |
| C  | -4.98080300 | 1.22555500  | -2.34256800 |
| H  | -6.01726900 | 1.58831900  | -2.26247800 |
| C  | -4.41243200 | 0.51104900  | -1.27669300 |
| H  | -5.01207900 | 0.31249800  | -0.37534200 |
| C  | -2.88964600 | -0.36097700 | 1.58477400  |
| C  | -3.17158700 | 1.00693100  | 1.79150100  |

|    |             |             |             |
|----|-------------|-------------|-------------|
| H  | -3.13298000 | 1.72952900  | 0.96271100  |
| C  | -3.47599000 | 1.47058400  | 3.08231500  |
| H  | -3.69061400 | 2.54033500  | 3.22981500  |
| C  | -3.49424100 | 0.58528300  | 4.17177800  |
| H  | -3.73467400 | 0.95475500  | 5.18087800  |
| C  | -3.19337900 | -0.77304100 | 3.97193500  |
| H  | -3.19326900 | -1.47217400 | 4.82260200  |
| C  | -2.88568700 | -1.24645900 | 2.68741100  |
| Cl | 0.31263700  | -3.50969600 | 0.44272700  |
| C  | 2.15114700  | -0.87642300 | 0.01454200  |
| C  | 2.87633900  | -0.54925400 | -1.06346300 |
| H  | 2.53082500  | -0.22057500 | -2.05060600 |
| C  | 2.84117200  | -1.29428800 | 1.28228800  |
| H  | 2.53121500  | -0.65729000 | 2.13819500  |
| H  | 2.56623800  | -2.34275700 | 1.53522300  |
| N  | 4.30610300  | -1.18718600 | 1.14350700  |
| H  | 4.86708600  | -1.34569800 | 1.98878800  |
| C  | 4.95434700  | -0.89698500 | 0.03239400  |
| O  | 4.30758700  | -0.60151000 | -1.07367200 |
| C  | 6.42203600  | -0.87004000 | -0.05317600 |
| C  | 7.03520600  | -0.17158800 | -1.12007000 |
| C  | 7.22382100  | -1.53684800 | 0.90299100  |
| C  | 8.43092700  | -0.12904000 | -1.21401500 |
| H  | 6.41199500  | 0.34596000  | -1.86291200 |
| C  | 8.61848300  | -1.48996000 | 0.79830600  |
| H  | 6.76502000  | -2.11805400 | 1.71777700  |
| C  | 9.22381700  | -0.78485200 | -0.25667300 |
| H  | 8.90409800  | 0.42253900  | -2.04018900 |
| H  | 9.23760100  | -2.01584700 | 1.54040500  |
| H  | 10.32132200 | -0.75067600 | -0.33516600 |
| H  | -2.63654900 | -2.30976500 | 2.54536600  |
| C  | 0.79621900  | 5.12283200  | -0.12891400 |
| C  | 0.14780600  | 6.48804300  | 0.03586900  |
| C  | -1.15129900 | 6.28785700  | 0.33025500  |
| C  | -1.38675800 | 4.78678800  | 0.36495400  |
| N  | -0.18375500 | 4.16819700  | 0.08390400  |
| H  | 0.70562900  | 7.42819300  | -0.08070200 |
| H  | -1.95043600 | 7.01832800  | 0.52085700  |
| O  | 1.97820300  | 4.92017900  | -0.40225900 |
| O  | -2.46772500 | 4.24360000  | 0.60241800  |
| I  | 0.08530500  | 1.77009400  | -0.03074500 |

Table S19. Calculated Gibbs energy and XYZ coordinates for all atoms in **TS2a'** activated by  $C_4H_2INO_2$ .

$G = -2803.3044$  Hartree      Frequency = -104.82

|    |             |             |             |
|----|-------------|-------------|-------------|
| P  | -0.83505100 | 1.94404900  | -0.18179900 |
| C  | -1.70683000 | 2.25820600  | 1.40469500  |
| Au | 0.19519200  | -0.15459300 | -0.39205600 |
| C  | -1.15048500 | 3.11008200  | 2.38231700  |
| H  | -0.19786200 | 3.62761800  | 2.19501000  |
| C  | -1.81666800 | 3.30261300  | 3.60361200  |
| H  | -1.37707400 | 3.97092800  | 4.35995900  |
| C  | -3.03378100 | 2.65022500  | 3.85747400  |
| H  | -3.55241900 | 2.80391000  | 4.81648800  |
| C  | -3.58828700 | 1.80079600  | 2.88469400  |
| H  | -4.54075300 | 1.28165100  | 3.07231500  |
| C  | -2.93084500 | 1.59981600  | 1.66232000  |
| H  | -3.38130000 | 0.92591300  | 0.91815800  |
| C  | -2.03385600 | 2.25251000  | -1.53119600 |
| C  | -1.85752400 | 1.57423500  | -2.75644400 |
| H  | -1.04083600 | 0.84113800  | -2.86240000 |
| C  | -2.72437700 | 1.82802200  | -3.82971700 |
| H  | -2.58381900 | 1.29472600  | -4.78234800 |
| C  | -3.77265000 | 2.75234500  | -3.68389300 |
| H  | -4.45654500 | 2.94578600  | -4.52477900 |
| C  | -3.95346100 | 3.42492800  | -2.46378600 |
| H  | -4.77627600 | 4.14685400  | -2.34662800 |
| C  | -3.08788500 | 3.18013800  | -1.38581800 |
| H  | -3.23715900 | 3.70944900  | -0.43249300 |
| C  | 0.49251000  | 3.20625400  | -0.32280000 |
| C  | 0.29318700  | 4.42666000  | -1.00283900 |
| H  | -0.67251700 | 4.64972500  | -1.48092500 |
| C  | 1.33883700  | 5.36108600  | -1.07597500 |
| H  | 1.17979800  | 6.31020000  | -1.61101000 |
| C  | 2.58034500  | 5.08818400  | -0.47529700 |
| H  | 3.39631600  | 5.82484600  | -0.54115500 |
| C  | 2.78012400  | 3.87411300  | 0.20209200  |
| H  | 3.73835200  | 3.61891800  | 0.68327900  |
| C  | 1.74238900  | 2.93299000  | 0.27473100  |
| Cl | 4.44201100  | 1.30950000  | 2.24016900  |
| C  | 2.05012100  | -2.00402200 | 0.13005500  |
| C  | 1.24949600  | -1.95311700 | -0.85096000 |
| H  | 1.05427000  | -2.45115800 | -1.80789900 |
| C  | 2.75244300  | -1.79728800 | 1.39696800  |
| H  | 2.28912000  | -0.94938100 | 1.94668300  |
| H  | 2.61759900  | -2.70815000 | 2.02643400  |
| N  | 4.14741300  | -1.48499900 | 1.17852300  |
| H  | 4.46881600  | -0.54456300 | 1.57763900  |



|   |             |             |             |
|---|-------------|-------------|-------------|
| C | 4.74516600  | -2.19344900 | 0.19372600  |
| O | 4.08527200  | -3.06799500 | -0.42369900 |
| C | 6.18180000  | -1.92077400 | -0.12402600 |
| C | 6.85506300  | -2.82755600 | -0.97066600 |
| C | 6.86700600  | -0.78950100 | 0.37402600  |
| C | 8.20035400  | -2.61968700 | -1.30309300 |
| H | 6.30198700  | -3.69574300 | -1.35926100 |
| C | 8.21118800  | -0.58266600 | 0.02893100  |
| H | 6.34718100  | -0.05206500 | 1.01264200  |
| C | 8.88170800  | -1.49632700 | -0.80262800 |
| H | 8.72082900  | -3.33572300 | -1.95798700 |
| H | 8.73952600  | 0.30385900  | 0.41308100  |
| H | 9.93841500  | -1.33024200 | -1.06489500 |
| H | 1.93411600  | 1.98872600  | 0.81163200  |
| C | -5.34363700 | -2.10740700 | 0.69954600  |
| C | -6.44535400 | -3.13460900 | 0.75249700  |
| C | -5.94808200 | -4.32169800 | 0.34946000  |
| C | -4.48959000 | -4.14483600 | 0.01015100  |
| N | -4.20711800 | -2.79051300 | 0.24906200  |
| H | -7.46303200 | -2.87755200 | 1.07631500  |
| H | -6.45083000 | -5.29389300 | 0.25632200  |
| O | -5.41430400 | -0.92083100 | 0.98476300  |
| O | -3.70434300 | -4.98790300 | -0.39008700 |
| I | -2.31604000 | -1.86517700 | -0.03599100 |

Table S20. Calculated Gibbs energy and XYZ coordinates for all atoms in **IM2a'** activated by C<sub>4</sub>H<sub>2</sub>INO<sub>2</sub>.

$G = -2803.3381$ Hartree

|    |            |             |             |
|----|------------|-------------|-------------|
| P  | 2.68046100 | -1.15509900 | 0.00206500  |
| C  | 3.00455400 | -0.65322600 | 1.74409900  |
| Au | 0.43146300 | -0.84017700 | -0.71465600 |
| C  | 3.38317800 | -1.58496200 | 2.73254500  |
| H  | 3.52683600 | -2.64449000 | 2.47250000  |
| C  | 3.57971000 | -1.16149200 | 4.05809600  |
| H  | 3.87580300 | -1.89555100 | 4.82347600  |
| C  | 3.40199700 | 0.18734500  | 4.40488400  |
| H  | 3.55707500 | 0.51500200  | 5.44460700  |
| C  | 3.02258700 | 1.11745400  | 3.42147300  |
| H  | 2.87627800 | 2.17772300  | 3.67912000  |
| C  | 2.81905600 | 0.70301600  | 2.09725300  |
| H  | 2.51321500 | 1.44812600  | 1.34615600  |
| C  | 3.91402000 | -0.25305300 | -1.02015300 |
| C  | 3.62440900 | -0.05531800 | -2.38773300 |

|    |             |             |             |
|----|-------------|-------------|-------------|
| H  | 2.66567800  | -0.40860000 | -2.80099900 |
| C  | 4.55067100  | 0.59575600  | -3.21648600 |
| H  | 4.31730300  | 0.74799800  | -4.28155900 |
| C  | 5.76557500  | 1.06096000  | -2.68513600 |
| H  | 6.48867900  | 1.57824100  | -3.33469500 |
| C  | 6.05380100  | 0.87306400  | -1.32313800 |
| H  | 7.00254700  | 1.24107100  | -0.90280400 |
| C  | 5.13356400  | 0.21765400  | -0.48886800 |
| H  | 5.36500700  | 0.07941000  | 0.57829300  |
| C  | 3.13353400  | -2.93582300 | -0.10522300 |
| C  | 4.46011700  | -3.36598600 | -0.31805100 |
| H  | 5.26997400  | -2.63092000 | -0.44305200 |
| C  | 4.74965300  | -4.73849300 | -0.37676300 |
| H  | 5.78610100  | -5.06892600 | -0.54663100 |
| C  | 3.72352800  | -5.68630500 | -0.22216600 |
| H  | 3.95541800  | -6.76157400 | -0.27135500 |
| C  | 2.40092200  | -5.26165700 | -0.01200400 |
| H  | 1.59302800  | -6.00054200 | 0.10368600  |
| C  | 2.10398700  | -3.89078900 | 0.04137600  |
| Cl | -5.46742200 | -1.38704400 | 3.59827800  |
| C  | -2.58640100 | -0.81881100 | -0.60911800 |
| C  | -1.49445600 | -0.71136500 | -1.38613100 |
| H  | -1.67761900 | -0.61093300 | -2.47175900 |
| C  | -2.79249700 | -0.92683300 | 0.88713500  |
| H  | -2.29198400 | -1.81208600 | 1.33448600  |
| H  | -2.42952500 | -0.02886000 | 1.43451300  |
| N  | -4.24269400 | -1.04307900 | 0.99780800  |
| H  | -4.76036900 | -1.17247900 | 2.01277600  |
| C  | -4.78725900 | -0.98596000 | -0.19087500 |
| O  | -3.89421700 | -0.84414200 | -1.18254500 |
| C  | -6.20575500 | -1.06187800 | -0.53321100 |
| C  | -6.60030100 | -0.97576800 | -1.88956800 |
| C  | -7.17780700 | -1.22300500 | 0.48367800  |
| C  | -7.95750600 | -1.05009500 | -2.22357800 |
| H  | -5.83996300 | -0.85041200 | -2.67366200 |
| C  | -8.53122400 | -1.29608400 | 0.13332300  |
| H  | -6.86673700 | -1.29127600 | 1.54346700  |
| C  | -8.92342000 | -1.21018100 | -1.21449200 |
| H  | -8.26472300 | -0.98243200 | -3.27814400 |
| H  | -9.28905600 | -1.42143700 | 0.92170900  |
| H  | -9.99030200 | -1.26833400 | -1.48082000 |
| H  | 1.06501300  | -3.55278300 | 0.19309700  |
| C  | 1.01399400  | 4.71840500  | 0.94206500  |
| C  | 0.73190000  | 6.19886800  | 1.01810900  |

|   |             |            |             |
|---|-------------|------------|-------------|
| C | -0.33969500 | 6.46956100 | 0.24576800  |
| C | -0.81909800 | 5.18067600 | -0.37724600 |
| N | 0.04639200  | 4.18292700 | 0.08876800  |
| H | 1.34593400  | 6.87824500 | 1.62491000  |
| H | -0.83726700 | 7.42967400 | 0.05195500  |
| O | 1.90837000  | 4.10381900 | 1.50855100  |
| O | -1.76561100 | 5.02494600 | -1.13318900 |
| I | -0.09526300 | 2.08446000 | -0.39152600 |

Table S21. Calculated Gibbs energy and XYZ coordinates for all atoms in **COM1b** activated by C<sub>6</sub>F<sub>5</sub>I.

$G = -3172.1518$  Hartree

|    |            |             |             |
|----|------------|-------------|-------------|
| P  | 3.40820500 | -1.11693200 | 0.07450400  |
| C  | 2.87033400 | -2.76362500 | 0.69110500  |
| Au | 1.66650500 | 0.08484300  | -0.75791300 |
| C  | 3.66164000 | -3.91905800 | 0.52535400  |
| H  | 4.62498500 | -3.86324400 | -0.00381600 |
| C  | 3.21511600 | -5.15046600 | 1.03300900  |
| H  | 3.83430500 | -6.05066900 | 0.89746600  |
| C  | 1.98537100 | -5.23450100 | 1.70598100  |
| H  | 1.63789400 | -6.20233300 | 2.09944100  |
| C  | 1.19400300 | -4.08429700 | 1.86945200  |
| H  | 0.22588500 | -4.14705800 | 2.38975500  |
| C  | 1.62945400 | -2.85209700 | 1.35997200  |
| H  | 1.00173800 | -1.95334700 | 1.47552500  |
| C  | 4.23446200 | -0.27964800 | 1.48681500  |
| C  | 4.41546800 | 1.11948000  | 1.42087900  |
| H  | 4.04305200 | 1.68152800  | 0.54914800  |
| C  | 5.05797800 | 1.79333900  | 2.46984100  |
| H  | 5.19500000 | 2.88416700  | 2.41380800  |
| C  | 5.51270400 | 1.07999800  | 3.59268100  |
| H  | 6.00886600 | 1.61219900  | 4.41898200  |
| C  | 5.32681700 | -0.31031900 | 3.66395700  |
| H  | 5.67748400 | -0.87106800 | 4.54414100  |
| C  | 4.69034700 | -0.99404100 | 2.61422200  |
| H  | 4.54627400 | -2.08335000 | 2.67825500  |
| C  | 4.71703000 | -1.43007200 | -1.17734300 |
| C  | 6.08451400 | -1.45754100 | -0.83268000 |
| H  | 6.40137000 | -1.26680400 | 0.20392400  |
| C  | 7.04840800 | -1.72424800 | -1.81901600 |
| H  | 8.11493600 | -1.74057600 | -1.54639400 |
| C  | 6.65528900 | -1.96532200 | -3.14560700 |
| H  | 7.41444400 | -2.16996500 | -3.91635200 |

|    |             |             |             |
|----|-------------|-------------|-------------|
| C  | 5.29312100  | -1.93648500 | -3.49114000 |
| H  | 4.98143600  | -2.11769100 | -4.53132300 |
| C  | 4.32479400  | -1.66529700 | -2.51325300 |
| Cl | -0.15869600 | 1.30784000  | -1.66547000 |
| C  | -0.17820500 | 1.54037000  | 2.63029700  |
| C  | 0.83225600  | 0.95734200  | 3.00327400  |
| H  | 1.72785100  | 0.45409300  | 3.34944300  |
| C  | -1.39315800 | 2.22597300  | 2.17401000  |
| H  | -2.14293000 | 1.46944100  | 1.85162900  |
| H  | -1.83914600 | 2.79628200  | 3.01658800  |
| N  | -1.15758700 | 3.18719500  | 1.10861900  |
| H  | -0.86822300 | 2.81637600  | 0.19500400  |
| C  | -1.30645000 | 4.53048900  | 1.32680500  |
| O  | -1.67351100 | 4.98211200  | 2.42146500  |
| C  | -1.01973500 | 5.45346600  | 0.16466400  |
| C  | -1.31979100 | 6.81977500  | 0.35410100  |
| C  | -0.46699000 | 5.04139500  | -1.06740900 |
| C  | -1.08392800 | 7.75356400  | -0.66361500 |
| H  | -1.74261300 | 7.12513000  | 1.32280100  |
| C  | -0.22903300 | 5.97791600  | -2.08582000 |
| H  | -0.21071700 | 3.98696900  | -1.25578000 |
| C  | -0.53720000 | 7.33430200  | -1.88891700 |
| H  | -1.32692600 | 8.81534000  | -0.50129000 |
| H  | 0.20270400  | 5.64178200  | -3.04137400 |
| H  | -0.35003300 | 8.06534700  | -2.69103200 |
| H  | 3.25768300  | -1.62797400 | -2.78654500 |
| C  | -4.64811600 | -1.27246900 | -0.29996700 |
| C  | -5.13081200 | -1.10465500 | 1.00777700  |
| C  | -6.31737600 | -1.72883400 | 1.42640200  |
| C  | -7.03273100 | -2.53592500 | 0.52720300  |
| C  | -6.56182800 | -2.71342100 | -0.78361000 |
| C  | -5.37389800 | -2.08218000 | -1.18791800 |
| I  | -2.85806100 | -0.32049100 | -0.91300700 |
| F  | -4.95354000 | -2.27391400 | -2.44466700 |
| F  | -7.24564400 | -3.48255600 | -1.63856800 |
| F  | -8.16158600 | -3.13328300 | 0.91847500  |
| F  | -6.76801700 | -1.56091600 | 2.67483400  |
| F  | -4.47401700 | -0.34435000 | 1.89512600  |

Table S22. Calculated Gibbs energy and XYZ coordinates for all atoms in **TS1b** activated by C<sub>6</sub>F<sub>5</sub>I.

$G = -3172.1356$  Hartree    Frequency = -49.90

|   |            |             |             |
|---|------------|-------------|-------------|
| P | 3.37238700 | -1.11209500 | 0.01234600  |
| C | 2.91326500 | -2.82673000 | -0.47173800 |

|    |             |             |             |
|----|-------------|-------------|-------------|
| Au | 1.49763800  | 0.22601300  | 0.22917500  |
| C  | 3.77891400  | -3.64557000 | -1.22750200 |
| H  | 4.75369500  | -3.26220000 | -1.56559000 |
| C  | 3.39366400  | -4.95518400 | -1.55638800 |
| H  | 4.07106700  | -5.58817600 | -2.15027900 |
| C  | 2.15008400  | -5.45468400 | -1.13443400 |
| H  | 1.85095700  | -6.48110800 | -1.39777800 |
| C  | 1.28437300  | -4.64041100 | -0.38485400 |
| H  | 0.30493800  | -5.02386600 | -0.05987900 |
| C  | 1.66021400  | -3.32849700 | -0.05811400 |
| H  | 0.97484200  | -2.68087700 | 0.51326600  |
| C  | 4.35493000  | -1.26804200 | 1.56171100  |
| C  | 4.76533700  | -0.07854200 | 2.20652000  |
| H  | 4.50912900  | 0.90161300  | 1.77220300  |
| C  | 5.49920200  | -0.14189700 | 3.40005700  |
| H  | 5.81924900  | 0.78907000  | 3.89314700  |
| C  | 5.81699800  | -1.38847800 | 3.96814600  |
| H  | 6.38685700  | -1.43595200 | 4.90900300  |
| C  | 5.40163700  | -2.57113600 | 3.33614100  |
| H  | 5.64503600  | -3.54958700 | 3.77855700  |
| C  | 4.67373000  | -2.51596100 | 2.13505200  |
| H  | 4.35516200  | -3.44916500 | 1.64664000  |
| C  | 4.56116800  | -0.52143200 | -1.26276400 |
| C  | 5.95452200  | -0.69912000 | -1.12374100 |
| H  | 6.36727500  | -1.17773500 | -0.22267600 |
| C  | 6.82111800  | -0.25990400 | -2.13805400 |
| H  | 7.90729300  | -0.39873500 | -2.02269800 |
| C  | 6.30633200  | 0.35400900  | -3.29176700 |
| H  | 6.98927200  | 0.70002800  | -4.08312800 |
| C  | 4.91949000  | 0.53383700  | -3.43144300 |
| H  | 4.51168700  | 1.02121700  | -4.33044700 |
| C  | 4.04770100  | 0.10358800  | -2.41985700 |
| Cl | -0.13524300 | 1.24863900  | -1.42956200 |
| C  | 0.09830000  | 1.38327800  | 2.28241600  |
| C  | 1.11832900  | 0.70067600  | 2.48300600  |
| H  | 1.92518600  | 0.23582600  | 3.05021100  |
| C  | -1.12604600 | 2.16146700  | 2.07265900  |
| H  | -1.96512400 | 1.46251600  | 1.85195700  |
| H  | -1.38281800 | 2.69819000  | 3.01331600  |
| N  | -1.00770600 | 3.17022800  | 1.03731000  |
| H  | -0.81497000 | 2.82350400  | 0.08516800  |
| C  | -1.14638800 | 4.49992300  | 1.32485100  |
| O  | -1.40298600 | 4.90574300  | 2.46810700  |
| C  | -0.98641600 | 5.46206800  | 0.17118100  |

|   |             |             |             |
|---|-------------|-------------|-------------|
| C | -1.29513000 | 6.81562500  | 0.42486800  |
| C | -0.53771800 | 5.09215300  | -1.11591200 |
| C | -1.16944200 | 7.77990400  | -0.58408000 |
| H | -1.63552400 | 7.08702200  | 1.43536400  |
| C | -0.40974300 | 6.05977300  | -2.12481800 |
| H | -0.27754100 | 4.04773100  | -1.35240800 |
| C | -0.72575100 | 7.40365500  | -1.86376100 |
| H | -1.41777900 | 8.83167800  | -0.37237100 |
| H | -0.05764000 | 5.75897400  | -3.12382000 |
| H | -0.62458300 | 8.15890000  | -2.65891300 |
| H | 2.96179200  | 0.26052900  | -2.52315000 |
| C | -4.62056800 | -1.25003200 | -0.26976900 |
| C | -5.16221000 | -1.06956300 | 1.01244900  |
| C | -6.35547400 | -1.70601700 | 1.39173600  |
| C | -7.02029400 | -2.53735000 | 0.47596600  |
| C | -6.49111100 | -2.72794000 | -0.81057100 |
| C | -5.29669200 | -2.08380500 | -1.17346300 |
| I | -2.80875700 | -0.27796400 | -0.81781000 |
| F | -4.81999700 | -2.28945500 | -2.40873900 |
| F | -7.12673800 | -3.52141100 | -1.68117200 |
| F | -8.15595400 | -3.14671700 | 0.82879300  |
| F | -6.86166200 | -1.52623800 | 2.61765100  |
| F | -4.55493800 | -0.28431400 | 1.91484900  |

Table S23. Calculated Gibbs energy and XYZ coordinates for all atoms in **IM1b** activated by C<sub>6</sub>F<sub>5</sub>I.

$G = -3172.1430$  Hartree

|    |             |             |             |
|----|-------------|-------------|-------------|
| P  | 3.19867500  | -1.04200300 | -0.05642000 |
| C  | 2.57322000  | -2.35152500 | -1.18502400 |
| Au | 1.43947900  | 0.27079500  | 0.89587100  |
| C  | 3.28037200  | -2.74880400 | -2.33888600 |
| H  | 4.23144200  | -2.26123500 | -2.60215300 |
| C  | 2.76727900  | -3.76717200 | -3.15875200 |
| H  | 3.32160400  | -4.07030700 | -4.06050900 |
| C  | 1.55260700  | -4.39319900 | -2.83329900 |
| H  | 1.15172500  | -5.18814600 | -3.48119000 |
| C  | 0.84472700  | -3.99796300 | -1.68536300 |
| H  | -0.11222800 | -4.47929800 | -1.43126700 |
| C  | 1.34874200  | -2.97753600 | -0.86513100 |
| H  | 0.78515700  | -2.65793500 | 0.02642700  |
| C  | 4.19202400  | -1.92025300 | 1.22314700  |
| C  | 4.62419900  | -1.18457700 | 2.34954100  |

|    |             |             |             |
|----|-------------|-------------|-------------|
| H  | 4.36273900  | -0.11799300 | 2.44377500  |
| C  | 5.38659100  | -1.80749900 | 3.34851700  |
| H  | 5.72292200  | -1.22546000 | 4.22054600  |
| C  | 5.71114300  | -3.17138200 | 3.24094200  |
| H  | 6.30160100  | -3.66155500 | 4.03048000  |
| C  | 5.27646100  | -3.90767000 | 2.12743200  |
| H  | 5.52569300  | -4.97655400 | 2.03942300  |
| C  | 4.52194900  | -3.28693700 | 1.11727200  |
| H  | 4.18951800  | -3.87241800 | 0.24680200  |
| C  | 4.41671700  | -0.06917400 | -1.03750300 |
| C  | 5.80675100  | -0.28665400 | -0.93371200 |
| H  | 6.20059600  | -1.04991800 | -0.24574300 |
| C  | 6.69598000  | 0.47520500  | -1.70989700 |
| H  | 7.77968600  | 0.30099100  | -1.62223100 |
| C  | 6.20666100  | 1.45218400  | -2.59194500 |
| H  | 6.90662500  | 2.04880700  | -3.19739200 |
| C  | 4.82204100  | 1.66969800  | -2.69752200 |
| H  | 4.43310200  | 2.43632100  | -3.38556200 |
| C  | 3.92649600  | 0.91759000  | -1.92235400 |
| Cl | 0.26604100  | 0.99946700  | -1.29905700 |
| C  | 0.22699400  | 1.23420300  | 2.43410500  |
| C  | 1.15419000  | 0.56050800  | 2.98445200  |
| H  | 1.74745800  | 0.15766300  | 3.80881200  |
| C  | -0.99017800 | 2.06205700  | 2.27842300  |
| H  | -1.86314000 | 1.37521700  | 2.18477800  |
| H  | -1.14692300 | 2.67789600  | 3.18978300  |
| N  | -0.92672000 | 2.97603100  | 1.15492900  |
| H  | -0.71727300 | 2.56618500  | 0.23276800  |
| C  | -1.12052700 | 4.31985600  | 1.32510200  |
| O  | -1.39137800 | 4.81245000  | 2.43041800  |
| C  | -1.00501600 | 5.18579900  | 0.09282400  |
| C  | -1.40006500 | 6.53423400  | 0.22582000  |
| C  | -0.51636300 | 4.73507300  | -1.15316300 |
| C  | -1.32182900 | 7.41366300  | -0.86229400 |
| H  | -1.76888700 | 6.87012900  | 1.20650700  |
| C  | -0.43542600 | 5.61852100  | -2.24123000 |
| H  | -0.18509800 | 3.69321500  | -1.29463300 |
| C  | -0.83887800 | 6.95699500  | -2.10098700 |
| H  | -1.63829100 | 8.46191200  | -0.74487300 |
| H  | -0.05078900 | 5.25577200  | -3.20713400 |
| H  | -0.77511200 | 7.64564400  | -2.95808000 |
| H  | 2.84116500  | 1.09493400  | -2.00411200 |
| C  | -4.38613100 | -1.21196600 | -0.27055100 |
| C  | -4.90317200 | -1.08329900 | 1.02788000  |

|   |             |             |             |
|---|-------------|-------------|-------------|
| C | -6.14873300 | -1.63465900 | 1.37085200  |
| C | -6.89161100 | -2.32724200 | 0.40113100  |
| C | -6.38754300 | -2.46611300 | -0.90204900 |
| C | -5.14036100 | -1.90777900 | -1.22770700 |
| I | -2.49950400 | -0.36089300 | -0.77032900 |
| F | -4.69050600 | -2.05828000 | -2.48096300 |
| F | -7.09746400 | -3.12845800 | -1.82338400 |
| F | -8.07741300 | -2.85493800 | 0.71881000  |
| F | -6.63097800 | -1.50547400 | 2.61270200  |
| F | -4.22242300 | -0.42920500 | 1.98177400  |

Table S24. Calculated Gibbs energy and XYZ coordinates for all atoms in **TS2b** activated by C<sub>6</sub>F<sub>5</sub>I.

$G = -3172.1162$  Hartree    Frequency = -269.47

|    |             |             |             |
|----|-------------|-------------|-------------|
| P  | -2.12654600 | -2.41320900 | -0.08493600 |
| C  | -0.60499100 | -3.42988200 | -0.27916100 |
| Au | -1.68056900 | -0.10944800 | -0.06296800 |
| C  | -0.49845000 | -4.72632200 | 0.26774600  |
| H  | -1.33201900 | -5.15569300 | 0.84450200  |
| C  | 0.67833700  | -5.46996000 | 0.08328300  |
| H  | 0.75732600  | -6.47993200 | 0.51469900  |
| C  | 1.75270100  | -4.92587500 | -0.64049100 |
| H  | 2.67760400  | -5.50814500 | -0.77470900 |
| C  | 1.65218600  | -3.63308000 | -1.18138800 |
| H  | 2.49892400  | -3.19387100 | -1.72994200 |
| C  | 0.47849800  | -2.88533200 | -1.00106400 |
| H  | 0.40541700  | -1.86424400 | -1.40932800 |
| C  | -3.25035100 | -2.91722700 | -1.45759400 |
| C  | -4.36867400 | -2.09848400 | -1.73043000 |
| H  | -4.53410700 | -1.18313100 | -1.13888100 |
| C  | -5.26299400 | -2.44329800 | -2.75432800 |
| H  | -6.13376300 | -1.80092600 | -2.95799200 |
| C  | -5.04077500 | -3.59785700 | -3.52548500 |
| H  | -5.73714600 | -3.86185000 | -4.33648400 |
| C  | -3.92486200 | -4.40888900 | -3.26438300 |
| H  | -3.74297400 | -5.31127100 | -3.86855200 |
| C  | -3.03181400 | -4.07507900 | -2.23175700 |
| H  | -2.16136200 | -4.71879500 | -2.03456200 |
| C  | -2.93251400 | -3.03185100 | 1.45331800  |
| C  | -4.02815900 | -3.91933000 | 1.42426400  |
| H  | -4.44153800 | -4.26119700 | 0.46332000  |
| C  | -4.59809300 | -4.36964400 | 2.62715700  |
| H  | -5.45436600 | -5.06138800 | 2.59755800  |



|    |             |             |             |
|----|-------------|-------------|-------------|
| C  | -4.07952600 | -3.94005000 | 3.85936100  |
| H  | -4.52932100 | -4.29376000 | 4.80019900  |
| C  | -2.98833700 | -3.05413200 | 3.88930100  |
| H  | -2.58100400 | -2.71104000 | 4.85315600  |
| C  | -2.41536800 | -2.59424000 | 2.69385700  |
| Cl | 0.05366800  | 0.12850100  | 2.14441700  |
| C  | -1.54800500 | 1.96108600  | -0.41260500 |
| C  | -2.39502200 | 2.07794700  | -1.36037000 |
| H  | -3.14497000 | 1.88571100  | -2.12425600 |
| C  | -0.68694700 | 2.98987000  | 0.25890200  |
| H  | -0.41001800 | 2.66098800  | 1.27850700  |
| H  | 0.26080200  | 3.06592300  | -0.32191300 |
| N  | -1.35496300 | 4.28155900  | 0.33020100  |
| H  | -1.34121900 | 4.75072900  | 1.23954800  |
| C  | -2.14448700 | 4.80786800  | -0.63889700 |
| O  | -2.38675900 | 4.21535500  | -1.72075500 |
| C  | -2.75269500 | 6.15304700  | -0.37004000 |
| C  | -3.91658900 | 6.50654800  | -1.08604200 |
| C  | -2.18861500 | 7.07898100  | 0.53464200  |
| C  | -4.52239100 | 7.75298900  | -0.88027900 |
| H  | -4.33627400 | 5.78433400  | -1.80183000 |
| C  | -2.79426200 | 8.32856100  | 0.73346500  |
| H  | -1.25611000 | 6.84258700  | 1.07088700  |
| C  | -3.96360200 | 8.66593100  | 0.03123200  |
| H  | -5.43598200 | 8.01613300  | -1.43546800 |
| H  | -2.34389100 | 9.04719200  | 1.43528800  |
| H  | -4.43719500 | 9.64729300  | 0.18968100  |
| H  | -1.56515800 | -1.88958200 | 2.72123200  |
| I  | 2.80842300  | 0.21064300  | 1.00191600  |
| C  | 4.79824700  | 0.28601500  | 0.17626000  |
| C  | 5.32802400  | -0.80223600 | -0.53152600 |
| C  | 5.59604700  | 1.42916600  | 0.32814700  |
| C  | 6.61942900  | -0.75835000 | -1.08247100 |
| C  | 6.89038600  | 1.49559600  | -0.21370500 |
| C  | 7.40269500  | 0.39555100  | -0.91996900 |
| F  | 5.14209700  | 2.50141600  | 0.99671700  |
| F  | 7.63951100  | 2.59597300  | -0.06056500 |
| F  | 8.63444900  | 0.44700000  | -1.43867500 |
| F  | 7.11062500  | -1.80646000 | -1.75762200 |
| F  | 4.61191500  | -1.92594000 | -0.70895200 |

Table S25. Calculated Gibbs energy and XYZ coordinates for all atoms in **IM2b** activated by C<sub>6</sub>F<sub>5</sub>I.

$G = -3172.1389$  Hartree

|    |             |             |             |
|----|-------------|-------------|-------------|
| P  | -2.42941400 | -2.23820300 | -0.09385000 |
| C  | -0.84000600 | -3.09603300 | -0.44475300 |
| Au | -2.28273600 | 0.09065800  | -0.35608200 |
| C  | -0.45099400 | -4.26561300 | 0.24162500  |
| H  | -1.09753100 | -4.68989800 | 1.02499200  |
| C  | 0.77216900  | -4.88388500 | -0.06495000 |
| H  | 1.07407500  | -5.79225300 | 0.47937700  |
| C  | 1.61153900  | -4.34096300 | -1.05164100 |
| H  | 2.57801500  | -4.81760200 | -1.27718100 |
| C  | 1.22694800  | -3.17595800 | -1.73676000 |
| H  | 1.89043800  | -2.73778000 | -2.49767900 |
| C  | 0.00741100  | -2.55221200 | -1.43415700 |
| H  | -0.28607700 | -1.62630300 | -1.95526200 |
| C  | -3.68577700 | -3.02766600 | -1.18531700 |
| C  | -4.86634200 | -2.30499300 | -1.46576400 |
| H  | -4.99910500 | -1.29323100 | -1.04880500 |
| C  | -5.86278600 | -2.86896900 | -2.27702000 |
| H  | -6.78057100 | -2.29929700 | -2.49020000 |
| C  | -5.68383000 | -4.15135800 | -2.82360300 |
| H  | -6.46245700 | -4.59003200 | -3.46683900 |
| C  | -4.50701900 | -4.86980700 | -2.55470700 |
| H  | -4.36074000 | -5.87248500 | -2.98557800 |
| C  | -3.50937400 | -4.31362200 | -1.73719100 |
| H  | -2.58974900 | -4.88340200 | -1.53407200 |
| C  | -2.87899300 | -2.72869600 | 1.62534500  |
| C  | -3.91169900 | -3.64709400 | 1.90430400  |
| H  | -4.48048800 | -4.11030200 | 1.08376200  |
| C  | -4.21984800 | -3.97364800 | 3.23612700  |
| H  | -5.02882700 | -4.69051000 | 3.44677500  |
| C  | -3.50106000 | -3.38942200 | 4.29136600  |
| H  | -3.74552100 | -3.64597100 | 5.33402100  |
| C  | -2.47163400 | -2.47305400 | 4.01349600  |
| H  | -1.90571000 | -2.00722500 | 4.83541700  |
| C  | -2.15959200 | -2.13475400 | 2.68797600  |
| Cl | 0.41760700  | 0.61552800  | 2.39428500  |
| C  | -2.08939100 | 2.13176800  | -0.53350900 |
| C  | -3.10717400 | 2.94281100  | -0.86251200 |
| H  | -4.14295300 | 2.68525400  | -1.11570900 |
| C  | -0.74492300 | 2.74795400  | -0.23637000 |
| H  | -0.31205400 | 2.33200400  | 0.70373500  |
| H  | -0.01301600 | 2.52311000  | -1.04507800 |
| N  | -0.85207500 | 4.21451100  | -0.09211800 |

|   |             |             |             |
|---|-------------|-------------|-------------|
| H | -0.05531400 | 4.70345800  | 0.33338100  |
| C | -1.88451600 | 4.94250500  | -0.46557100 |
| O | -2.97758500 | 4.37535500  | -0.92910100 |
| C | -1.90348600 | 6.41106600  | -0.38058300 |
| C | -3.14495500 | 7.08796100  | -0.43220000 |
| C | -0.70545600 | 7.15274300  | -0.25586500 |
| C | -3.18276000 | 8.48438000  | -0.34601000 |
| H | -4.07546900 | 6.51158200  | -0.52862900 |
| C | -0.75372400 | 8.54872200  | -0.17052700 |
| H | 0.27330300  | 6.64868300  | -0.25297100 |
| C | -1.99016600 | 9.21633400  | -0.21313100 |
| H | -4.15110000 | 9.00569900  | -0.37989000 |
| H | 0.18205000  | 9.12047200  | -0.08007800 |
| H | -2.02331600 | 10.31466400 | -0.14689500 |
| H | -1.35335300 | -1.40432200 | 2.48936000  |
| I | 2.95538200  | 0.12712400  | 1.13678400  |
| C | 4.89471600  | -0.21533400 | 0.18325100  |
| C | 5.15568200  | -1.39699200 | -0.52188400 |
| C | 5.91561600  | 0.74068300  | 0.26135900  |
| C | 6.39729700  | -1.63115100 | -1.13568300 |
| C | 7.16700500  | 0.53317300  | -0.34246900 |
| C | 7.40656700  | -0.65953800 | -1.04351700 |
| F | 5.72779200  | 1.89764400  | 0.92198100  |
| F | 8.13318500  | 1.46016300  | -0.25833900 |
| F | 8.59458900  | -0.86926100 | -1.62409100 |
| F | 6.62838200  | -2.76906900 | -1.80769400 |
| F | 4.21570200  | -2.35450700 | -0.63601900 |

Table S26. Calculated Gibbs energy and XYZ coordinates for all atoms in **TS2b'** activated by C<sub>6</sub>F<sub>5</sub>I.

$G = -3172.1298$  Hartree    Frequency = -126.83

|    |             |            |             |
|----|-------------|------------|-------------|
| P  | 0.50837000  | 3.05998500 | 0.14486100  |
| C  | -1.14822700 | 3.18417600 | -0.64309400 |
| Au | 1.93869400  | 1.70785000 | -1.08269600 |
| C  | -2.27743100 | 2.55370000 | -0.08276300 |
| H  | -2.19761600 | 2.01116700 | 0.87062300  |
| C  | -3.51270700 | 2.60666100 | -0.75108100 |
| H  | -4.38621200 | 2.10221900 | -0.31121100 |
| C  | -3.62731400 | 3.28827300 | -1.97266500 |
| H  | -4.59703900 | 3.32919000 | -2.49241400 |
| C  | -2.50009100 | 3.91208000 | -2.53670400 |
| H  | -2.58383800 | 4.44282800 | -3.49765800 |

|    |             |             |             |
|----|-------------|-------------|-------------|
| C  | -1.26141900 | 3.85470200  | -1.88226900 |
| H  | -0.38039700 | 4.33564500  | -2.33636400 |
| C  | 1.12878000  | 4.77485700  | 0.35783800  |
| C  | 2.52223000  | 4.96782300  | 0.47877000  |
| H  | 3.20393100  | 4.10510400  | 0.40176300  |
| C  | 3.03682300  | 6.25519000  | 0.69285300  |
| H  | 4.12425400  | 6.39957500  | 0.78526100  |
| C  | 2.16737400  | 7.35583000  | 0.78050400  |
| H  | 2.57320400  | 8.36651800  | 0.94194200  |
| C  | 0.78105500  | 7.16744800  | 0.65567300  |
| H  | 0.09753900  | 8.02807200  | 0.72071400  |
| C  | 0.25745300  | 5.88131900  | 0.44579700  |
| H  | -0.82994000 | 5.74378500  | 0.34596500  |
| C  | 0.24639000  | 2.37486700  | 1.83038100  |
| C  | -0.24925800 | 3.17499700  | 2.88307200  |
| H  | -0.47002700 | 4.24128800  | 2.72073900  |
| C  | -0.45694700 | 2.60778800  | 4.14991000  |
| H  | -0.84004000 | 3.23568500  | 4.96923100  |
| C  | -0.17677100 | 1.24806500  | 4.37498600  |
| H  | -0.34163600 | 0.81092400  | 5.37211500  |
| C  | 0.31638400  | 0.44959300  | 3.33061400  |
| H  | 0.54158900  | -0.61855300 | 3.47996300  |
| C  | 0.53213500  | 1.01333100  | 2.06344700  |
| Cl | 1.10861200  | -3.09768800 | 1.91104400  |
| C  | 2.84263800  | -0.64005300 | -1.95521300 |
| C  | 3.32663200  | 0.51573100  | -2.16093500 |
| H  | 4.21691300  | 0.97403200  | -2.60798000 |
| C  | 1.93408600  | -1.73460800 | -1.59073100 |
| H  | 1.07452400  | -1.33023300 | -1.01787300 |
| H  | 1.51872800  | -2.17513300 | -2.52751200 |
| N  | 2.61706000  | -2.73035500 | -0.79216600 |
| H  | 2.18048700  | -3.00459400 | 0.12591900  |
| C  | 3.88793500  | -2.98692300 | -1.17764300 |
| O  | 4.36332200  | -2.34174500 | -2.14785600 |
| C  | 4.68485000  | -4.02488300 | -0.45683600 |
| C  | 6.01690400  | -4.23750800 | -0.87376100 |
| C  | 4.15652800  | -4.79258500 | 0.60540400  |
| C  | 6.81118500  | -5.20271100 | -0.24125200 |
| H  | 6.41236000  | -3.63042600 | -1.70158500 |
| C  | 4.95831600  | -5.75419400 | 1.23762700  |
| H  | 3.12302500  | -4.63698300 | 0.95710800  |
| C  | 6.28279000  | -5.96344800 | 0.81629400  |
| H  | 7.84870400  | -5.36282800 | -0.57313300 |
| H  | 4.54257300  | -6.34657400 | 2.06729900  |

|   |             |             |             |
|---|-------------|-------------|-------------|
| H | 6.90584800  | -6.72240700 | 1.31486700  |
| H | 0.93133800  | 0.38590700  | 1.25055400  |
| C | -3.62830300 | -2.32551700 | 0.17319400  |
| C | -4.29088700 | -1.12969100 | 0.48091200  |
| C | -5.58738600 | -0.86741100 | 0.01036400  |
| C | -6.24084500 | -1.81861600 | -0.78904400 |
| C | -5.59704800 | -3.02652300 | -1.10256600 |
| C | -4.29794500 | -3.26490000 | -0.62287200 |
| I | -1.62120800 | -2.69711500 | 0.90223200  |
| F | -3.70095400 | -0.18819700 | 1.24029100  |
| F | -6.19963100 | 0.29193600  | 0.30232400  |
| F | -6.22389200 | -3.93584700 | -1.86150100 |
| F | -3.71492600 | -4.42911800 | -0.95171400 |
| F | -7.47465100 | -1.57777800 | -1.24557600 |

Table S27. Calculated Gibbs energy and XYZ coordinates for all atoms in **IM2b'** activated by C<sub>6</sub>F<sub>5</sub>I.

$G = -3172.1563$  Hartree

|    |            |             |             |
|----|------------|-------------|-------------|
| P  | 3.02952200 | -1.34179400 | -0.00444300 |
| C  | 3.24754800 | 0.00364300  | -1.24699600 |
| Au | 0.92033700 | -2.37049400 | -0.16797000 |
| C  | 3.58189700 | 1.32448600  | -0.88724100 |
| H  | 3.74576400 | 1.58936200  | 0.16749000  |
| C  | 3.68913100 | 2.31730600  | -1.87695300 |
| H  | 3.92872600 | 3.35077300  | -1.58241500 |
| C  | 3.47574500 | 1.99655500  | -3.22684300 |
| H  | 3.55962300 | 2.77657700  | -3.99943900 |
| C  | 3.14523500 | 0.67857600  | -3.58955300 |
| H  | 2.97155500 | 0.42259400  | -4.64625300 |
| C  | 3.02091300 | -0.31302800 | -2.60562500 |
| H  | 2.74409200 | -1.34005200 | -2.89419200 |
| C  | 4.44374000 | -2.48799600 | -0.26875000 |
| C  | 4.29282700 | -3.83659300 | 0.12082700  |
| H  | 3.33500600 | -4.17891300 | 0.54557800  |
| C  | 5.35612000 | -4.73867600 | -0.03880200 |
| H  | 5.23097000 | -5.78923800 | 0.26581000  |
| C  | 6.57127800 | -4.30376100 | -0.59444000 |
| H  | 7.40224700 | -5.01416400 | -0.72586400 |
| C  | 6.72349100 | -2.96361000 | -0.98840800 |
| H  | 7.67345500 | -2.62072800 | -1.42696000 |
| C  | 5.66541300 | -2.05467000 | -0.82661400 |

|    |             |             |             |
|----|-------------|-------------|-------------|
| H  | 5.79169800  | -1.00675600 | -1.13935300 |
| C  | 3.31393200  | -0.55264600 | 1.63448800  |
| C  | 4.53673700  | -0.65710000 | 2.32868200  |
| H  | 5.37201700  | -1.23156600 | 1.90042800  |
| C  | 4.69058600  | -0.02726000 | 3.57500500  |
| H  | 5.64608900  | -0.11732300 | 4.11470200  |
| C  | 3.63509100  | 0.71581400  | 4.12875000  |
| H  | 3.76217600  | 1.21129300  | 5.10383200  |
| C  | 2.41603400  | 0.82434300  | 3.43799000  |
| H  | 1.58650700  | 1.41186400  | 3.85968200  |
| C  | 2.24982100  | 0.18258400  | 2.20168900  |
| Cl | -5.48516900 | 1.29163200  | 0.75024500  |
| C  | -2.08698100 | -2.61744400 | -0.16113700 |
| C  | -0.91935800 | -3.25415300 | -0.32828300 |
| H  | -1.00057400 | -4.32963000 | -0.57653200 |
| C  | -2.45264200 | -1.18477800 | 0.17340400  |
| H  | -2.07715600 | -0.85928800 | 1.16723900  |
| H  | -2.08213700 | -0.45476700 | -0.57757400 |
| N  | -3.91317400 | -1.23232200 | 0.16757700  |
| H  | -4.52184500 | -0.36693600 | 0.38259200  |
| C  | -4.33624900 | -2.44590300 | -0.10977200 |
| O  | -3.34682900 | -3.31097000 | -0.30879800 |
| C  | -5.71782200 | -2.90841100 | -0.21579100 |
| C  | -5.96960900 | -4.28219800 | -0.44499200 |
| C  | -6.79574000 | -1.99863600 | -0.09414700 |
| C  | -7.28834000 | -4.73909200 | -0.54653500 |
| H  | -5.12825900 | -4.98349900 | -0.53900800 |
| C  | -8.10948700 | -2.46977100 | -0.19849800 |
| H  | -6.60596700 | -0.92510900 | 0.07844300  |
| C  | -8.35831900 | -3.83545200 | -0.42314400 |
| H  | -7.48373900 | -5.80755800 | -0.72292500 |
| H  | -8.94779300 | -1.76300400 | -0.10499600 |
| H  | -9.39473000 | -4.19827200 | -0.50387300 |
| H  | 1.28955000  | 0.26386200  | 1.66831800  |
| C  | -1.07877400 | 3.80452800  | 0.11230000  |
| C  | 0.03224900  | 3.40747200  | 0.86882600  |
| C  | 1.29626600  | 3.98595700  | 0.67384600  |
| C  | 1.45492100  | 4.98678400  | -0.29748100 |
| C  | 0.35353200  | 5.40520600  | -1.06068700 |
| C  | -0.90214800 | 4.81168400  | -0.84622100 |
| I  | -2.98549100 | 2.82143200  | 0.37527400  |
| F  | -0.08197500 | 2.44140400  | 1.80000900  |
| F  | 2.35688900  | 3.58337200  | 1.39135800  |
| F  | 0.50922900  | 6.36090100  | -1.98634100 |

|   |             |            |             |
|---|-------------|------------|-------------|
| F | -1.93034900 | 5.23249400 | -1.59927200 |
| F | 2.66140100  | 5.53007800 | -0.50555200 |

Table S28. Calculated Gibbs energy and XYZ coordinates for all atoms in **COM1c** activated by C<sub>8</sub>H<sub>9</sub>O<sub>2</sub>I.

$G = -2904.9886$  Hartree

|    |             |             |             |
|----|-------------|-------------|-------------|
| P  | 3.37070200  | -1.37890400 | 0.05130400  |
| C  | 2.78171700  | -2.94908800 | 0.80566200  |
| Au | 1.66437500  | -0.10527200 | -0.74659600 |
| C  | 3.51142200  | -4.15044300 | 0.68931100  |
| H  | 4.45102600  | -4.17773100 | 0.11673400  |
| C  | 3.03336700  | -5.32065600 | 1.30189000  |
| H  | 3.60395600  | -6.25721400 | 1.20462900  |
| C  | 1.83313600  | -5.29782800 | 2.03090500  |
| H  | 1.46004700  | -6.21808900 | 2.50655700  |
| C  | 1.10370900  | -4.10183900 | 2.14624100  |
| H  | 0.15868800  | -4.08130900 | 2.71051400  |
| C  | 1.57108900  | -2.93014900 | 1.53260900  |
| H  | 0.99172200  | -1.99565500 | 1.61113000  |
| C  | 4.34041200  | -0.51280900 | 1.35168500  |
| C  | 4.59452900  | 0.86660800  | 1.18649200  |
| H  | 4.19575800  | 1.39727200  | 0.30669700  |
| C  | 5.34235100  | 1.56229600  | 2.14780000  |
| H  | 5.53509000  | 2.63789700  | 2.01439400  |
| C  | 5.83061400  | 0.89145400  | 3.28258600  |
| H  | 6.40917700  | 1.44150100  | 4.04088300  |
| C  | 5.57284300  | -0.47863700 | 3.45311100  |
| H  | 5.94965700  | -1.00612700 | 4.34303200  |
| C  | 4.83044600  | -1.18430200 | 2.49113900  |
| H  | 4.63042500  | -2.25717100 | 2.63397400  |
| C  | 4.57309600  | -1.85569200 | -1.25522200 |
| C  | 5.96113000  | -1.90091400 | -1.01043800 |
| H  | 6.36102900  | -1.62693100 | -0.02232400 |
| C  | 6.83917600  | -2.29186900 | -2.03502300 |
| H  | 7.92240900  | -2.32160400 | -1.84035800 |
| C  | 6.33941000  | -2.63952700 | -3.30053800 |
| H  | 7.03113700  | -2.94232300 | -4.10185900 |
| C  | 4.95614300  | -2.59303700 | -3.54675300 |
| H  | 4.56097500  | -2.85795200 | -4.53956200 |
| C  | 4.07342400  | -2.19782700 | -2.53095900 |
| Cl | -0.10675000 | 1.21983000  | -1.59570200 |
| C  | 0.21826600  | 1.60439800  | 2.67402400  |

|   |             |             |             |
|---|-------------|-------------|-------------|
| C | 1.17702300  | 0.96733000  | 3.09225800  |
| H | 2.02864600  | 0.41605900  | 3.47440400  |
| C | -0.93539200 | 2.35678000  | 2.16345600  |
| H | -1.71728000 | 1.64278600  | 1.82212900  |
| H | -1.37059300 | 2.96613600  | 2.98365500  |
| N | -0.60720800 | 3.27575500  | 1.08598700  |
| H | -0.40397900 | 2.86015500  | 0.16738400  |
| C | -0.56130000 | 4.62605500  | 1.29985600  |
| O | -0.81177900 | 5.12528900  | 2.40682800  |
| C | -0.20213800 | 5.49898200  | 0.11859300  |
| C | -0.21593000 | 6.89332100  | 0.33788000  |
| C | 0.14489200  | 5.01366600  | -1.16122800 |
| C | 0.10534500  | 7.78516400  | -0.69398800 |
| H | -0.48628200 | 7.25338500  | 1.34177300  |
| C | 0.46701000  | 5.90782900  | -2.19445000 |
| H | 0.17026100  | 3.93357400  | -1.37692800 |
| C | 0.44830600  | 7.29380800  | -1.96555500 |
| H | 0.08860800  | 8.87025000  | -0.50658400 |
| H | 0.73518300  | 5.51503700  | -3.18756300 |
| H | 0.70138500  | 7.99130900  | -2.77937700 |
| H | 2.99025900  | -2.14715500 | -2.72864900 |
| C | -5.13820400 | -0.86151100 | -0.31431100 |
| C | -5.62755400 | -0.69227400 | 0.98714700  |
| C | -6.91071200 | -1.19937500 | 1.29524800  |
| C | -7.68076900 | -1.86124400 | 0.31411000  |
| C | -7.15461300 | -2.01357800 | -0.98728400 |
| C | -5.87337000 | -1.51273400 | -1.31310600 |
| H | -5.49139700 | -1.64570600 | -2.33435300 |
| H | -5.05293800 | -0.18102800 | 1.77138400  |
| H | -8.67506700 | -2.25112700 | 0.55924700  |
| O | -7.32704600 | -1.00251900 | 2.57343000  |
| O | -7.81640500 | -2.63395800 | -1.99879300 |
| C | -8.60896300 | -1.47966600 | 2.96264900  |
| H | -8.72926400 | -1.20899300 | 4.02862100  |
| H | -9.42489400 | -1.00184100 | 2.37671800  |
| H | -8.68889100 | -2.58461900 | 2.86127900  |
| C | -9.11248200 | -3.16431400 | -1.75079800 |
| H | -9.83455300 | -2.37255200 | -1.45242700 |
| H | -9.44993300 | -3.61498900 | -2.70318600 |
| H | -9.09487900 | -3.95317300 | -0.96654900 |
| I | -3.20111600 | -0.09943700 | -0.79397400 |

Table S29. Calculated Gibbs energy and XYZ coordinates for all atoms in **TS1c**



activated by C<sub>8</sub>H<sub>9</sub>O<sub>2</sub>I.

$G = -2904.9701$  Hartree    Frequency = -59.48

|    |             |             |             |
|----|-------------|-------------|-------------|
| P  | -3.44899200 | -1.27892500 | 0.04118700  |
| C  | -2.90402100 | -3.03582600 | 0.09626200  |
| Au | -1.66488200 | 0.14472200  | -0.32062700 |
| C  | -3.53016000 | -3.98962000 | 0.92596700  |
| H  | -4.36278400 | -3.69420800 | 1.58234500  |
| C  | -3.08692900 | -5.32233500 | 0.91935100  |
| H  | -3.57651800 | -6.06122200 | 1.57254400  |
| C  | -2.02326700 | -5.71066800 | 0.08802400  |
| H  | -1.67639200 | -6.75563600 | 0.08897000  |
| C  | -1.39553600 | -4.76218800 | -0.73743400 |
| H  | -0.55518600 | -5.05926500 | -1.38359400 |
| C  | -1.82879600 | -3.42776700 | -0.73090000 |
| H  | -1.32445700 | -2.67872800 | -1.36317900 |
| C  | -4.75930700 | -1.20093600 | -1.25123100 |
| C  | -5.21176800 | 0.07532900  | -1.65616900 |
| H  | -4.77949800 | 0.98246500  | -1.20295300 |
| C  | -6.20884500 | 0.19120300  | -2.63601200 |
| H  | -6.55806600 | 1.18925700  | -2.94297000 |
| C  | -6.75254700 | -0.96192700 | -3.22917400 |
| H  | -7.52952200 | -0.86913100 | -4.00381400 |
| C  | -6.29833800 | -2.23111000 | -2.83651900 |
| H  | -6.71859400 | -3.13684800 | -3.30064100 |
| C  | -5.30587600 | -2.35516900 | -1.84921600 |
| H  | -4.95860100 | -3.35475200 | -1.54697900 |
| C  | -4.32089100 | -0.96559600 | 1.63273300  |
| C  | -5.71008700 | -1.16944000 | 1.77596500  |
| H  | -6.31418300 | -1.50176100 | 0.91793400  |
| C  | -6.32707300 | -0.94388300 | 3.01741700  |
| H  | -7.41171700 | -1.10181600 | 3.12233900  |
| C  | -5.56595700 | -0.51779500 | 4.11842900  |
| H  | -6.05385400 | -0.33923200 | 5.08928000  |
| C  | -4.18306200 | -0.31065900 | 3.97725800  |
| H  | -3.58372900 | 0.03167500  | 4.83502100  |
| C  | -3.56058000 | -0.52700800 | 2.73854000  |
| Cl | 0.14757000  | 1.06886500  | 1.17657400  |
| C  | -0.60727500 | 1.53779400  | -2.39521700 |
| C  | -1.64314500 | 0.86685100  | -2.54641000 |
| H  | -2.51805200 | 0.45156900  | -3.04638400 |
| C  | 0.62391700  | 2.32174500  | -2.24492000 |
| H  | 1.48710700  | 1.62644700  | -2.14133600 |
| H  | 0.78760700  | 2.92075000  | -3.16807500 |

|   |             |             |             |
|---|-------------|-------------|-------------|
| N | 0.58432200  | 3.25459100  | -1.13585000 |
| H | 0.53782800  | 2.82876600  | -0.19658800 |
| C | 0.57929300  | 4.60603900  | -1.33927500 |
| O | 0.65608800  | 5.10713700  | -2.47095400 |
| C | 0.49028400  | 5.47157100  | -0.10415600 |
| C | 0.68012000  | 6.85834800  | -0.28342000 |
| C | 0.21092600  | 4.98007800  | 1.19018200  |
| C | 0.60548900  | 7.73757500  | 0.80519700  |
| H | 0.88669700  | 7.22385000  | -1.30051900 |
| C | 0.13328900  | 5.86260900  | 2.27911500  |
| H | 0.04508000  | 3.90539000  | 1.36969700  |
| C | 0.33166000  | 7.24085800  | 2.09143500  |
| H | 0.76063000  | 8.81689500  | 0.65093900  |
| H | -0.08664600 | 5.46784400  | 3.28323100  |
| H | 0.27100800  | 7.92903400  | 2.94913000  |
| H | -2.47974700 | -0.34345600 | 2.62393700  |
| C | 5.13952500  | -0.97089800 | 0.22360200  |
| C | 5.69603500  | -0.88060800 | -1.05900100 |
| C | 6.99160200  | -1.40461300 | -1.27198400 |
| C | 7.71019600  | -2.00653400 | -0.21578300 |
| C | 7.11843200  | -2.08004200 | 1.06423700  |
| C | 5.82382500  | -1.56133200 | 1.29409500  |
| H | 5.39117100  | -1.63370600 | 2.30129200  |
| H | 5.16332500  | -0.41738000 | -1.90073500 |
| H | 8.71479800  | -2.41041100 | -0.38537800 |
| O | 7.47195600  | -1.28422500 | -2.53769900 |
| O | 7.72719300  | -2.63764200 | 2.14383700  |
| C | 8.77055000  | -1.78292700 | -2.83241900 |
| H | 8.94508700  | -1.57739400 | -3.90543900 |
| H | 9.55715400  | -1.27005100 | -2.23590200 |
| H | 8.84310000  | -2.87967400 | -2.66027100 |
| C | 9.03132700  | -3.18355200 | 1.99336800  |
| H | 9.77025500  | -2.41370300 | 1.67925900  |
| H | 9.32141000  | -3.57163100 | 2.98805000  |
| H | 9.04862500  | -4.02186300 | 1.26212400  |
| I | 3.17921400  | -0.18210600 | 0.56370700  |

Table S30. Calculated Gibbs energy and XYZ coordinates for all atoms in **IM1c** activated by C<sub>8</sub>H<sub>9</sub>O<sub>2</sub>I.

$G = -2904.9765$  Hartree

|   |             |             |            |
|---|-------------|-------------|------------|
| P | -3.38541000 | -1.09275200 | 0.11476200 |
|---|-------------|-------------|------------|

|    |             |             |             |
|----|-------------|-------------|-------------|
| C  | -2.64665200 | -2.54663500 | 0.96495600  |
| Au | -1.74814500 | 0.27856000  | -0.96049700 |
| C  | -3.16057300 | -3.04811800 | 2.17891800  |
| H  | -4.02165500 | -2.56026600 | 2.66063900  |
| C  | -2.56881800 | -4.17130400 | 2.77972000  |
| H  | -2.97183200 | -4.55543700 | 3.72963600  |
| C  | -1.46712500 | -4.79906300 | 2.17539500  |
| H  | -1.00303200 | -5.67645400 | 2.65204900  |
| C  | -0.95149200 | -4.30064600 | 0.96678400  |
| H  | -0.08241900 | -4.78337000 | 0.49388900  |
| C  | -1.53440100 | -3.17579100 | 0.36427900  |
| H  | -1.11903200 | -2.77745400 | -0.57558900 |
| C  | -4.62502900 | -1.78372200 | -1.06090400 |
| C  | -5.20020100 | -0.90929600 | -2.01020500 |
| H  | -4.89998100 | 0.15097300  | -2.03469600 |
| C  | -6.15354800 | -1.38647000 | -2.92166900 |
| H  | -6.59997700 | -0.69690900 | -3.65483200 |
| C  | -6.52956400 | -2.74126600 | -2.90499600 |
| H  | -7.27098800 | -3.11682400 | -3.62718500 |
| C  | -5.95378700 | -3.61506800 | -1.96904900 |
| H  | -6.24268000 | -4.67744100 | -1.95324200 |
| C  | -5.00653000 | -3.14095000 | -1.04553600 |
| H  | -4.56414100 | -3.83326800 | -0.31344200 |
| C  | -4.37254400 | -0.21036700 | 1.39522300  |
| C  | -5.76590700 | -0.39114800 | 1.52286300  |
| H  | -6.30344400 | -1.06833400 | 0.84197600  |
| C  | -6.47380700 | 0.29723000  | 2.52213100  |
| H  | -7.56143100 | 0.15261200  | 2.61509500  |
| C  | -5.79926700 | 1.16412200  | 3.39721800  |
| H  | -6.35761600 | 1.70354600  | 4.17810800  |
| C  | -4.41102200 | 1.34487500  | 3.27187600  |
| H  | -3.87796800 | 2.02576800  | 3.95355600  |
| C  | -3.69606500 | 0.66566500  | 2.27369200  |
| Cl | -0.19205900 | 0.70758200  | 1.05231200  |
| C  | -0.75200200 | 1.38635100  | -2.54791100 |
| C  | -1.78283900 | 0.81211900  | -3.02239700 |
| H  | -2.50961300 | 0.53279300  | -3.78883900 |
| C  | 0.50516700  | 2.16637500  | -2.47704900 |
| H  | 1.35872600  | 1.45694000  | -2.57430000 |
| H  | 0.55813400  | 2.87431900  | -3.33162900 |
| N  | 0.62421400  | 2.95243000  | -1.26513300 |
| H  | 0.55148700  | 2.43761800  | -0.37376400 |
| C  | 0.77661400  | 4.31085900  | -1.31302500 |
| O  | 0.87159600  | 4.92812400  | -2.38455600 |

|   |             |             |             |
|---|-------------|-------------|-------------|
| C | 0.84046200  | 5.03408700  | 0.01185500  |
| C | 1.19362300  | 6.40002000  | -0.02656500 |
| C | 0.55109000  | 4.43595000  | 1.25814900  |
| C | 1.26864200  | 7.15339300  | 1.15256500  |
| H | 1.40585600  | 6.85127100  | -1.00739300 |
| C | 0.62377000  | 5.19334900  | 2.43799800  |
| H | 0.25675900  | 3.37574800  | 1.32883700  |
| C | 0.98391700  | 6.55057900  | 2.39021200  |
| H | 1.54976400  | 8.21721500  | 1.10743400  |
| H | 0.39393600  | 4.71639900  | 3.40354200  |
| H | 1.04048500  | 7.13984800  | 3.31890500  |
| H | -2.60734900 | 0.81315000  | 2.17421900  |
| C | 4.90312500  | -1.05184600 | 0.19577800  |
| C | 5.46158200  | -0.95536500 | -1.08557600 |
| C | 6.79082800  | -1.39588000 | -1.27880100 |
| C | 7.54092000  | -1.92223800 | -0.20436700 |
| C | 6.94655200  | -2.00443600 | 1.07394200  |
| C | 5.61822600  | -1.56915700 | 1.28392700  |
| H | 5.18488800  | -1.64524100 | 2.29059200  |
| H | 4.90521200  | -0.54875300 | -1.94120400 |
| H | 8.57126200  | -2.26188900 | -0.35924700 |
| O | 7.27084800  | -1.27374400 | -2.54450600 |
| O | 7.58435600  | -2.49270400 | 2.17028300  |
| C | 8.60209800  | -1.69014300 | -2.82037200 |
| H | 8.77060100  | -1.49573400 | -3.89643000 |
| H | 9.34832400  | -1.11358200 | -2.23014400 |
| H | 8.74664900  | -2.77577700 | -2.62477100 |
| C | 8.92869100  | -2.93778900 | 2.04296700  |
| H | 9.60712300  | -2.11921600 | 1.71554300  |
| H | 9.23904800  | -3.27810800 | 3.04896000  |
| H | 9.01890500  | -3.78900600 | 1.33240600  |
| I | 2.89333800  | -0.38281200 | 0.50573300  |

Table S31. Calculated Gibbs energy and XYZ coordinates for all atoms in **TS2c** activated by C<sub>8</sub>H<sub>9</sub>O<sub>2</sub>I.

$G = -2904.9469$  Hartree    Frequency = -266.29

|    |             |             |             |
|----|-------------|-------------|-------------|
| P  | -2.69472500 | -2.07063200 | -0.15971300 |
| C  | -1.41577200 | -3.32680800 | -0.58121800 |
| Au | -1.81133600 | 0.10202000  | -0.08172000 |
| C  | -1.42527100 | -4.62585700 | -0.03190500 |
| H  | -2.20459100 | -4.91780100 | 0.68857400  |
| C  | -0.43319200 | -5.54990000 | -0.39956300 |
| H  | -0.44357500 | -6.56126500 | 0.03571000  |

|    |             |             |             |
|----|-------------|-------------|-------------|
| C  | 0.56961300  | -5.18535500 | -1.31308000 |
| H  | 1.34903100  | -5.91051200 | -1.59428000 |
| C  | 0.58442000  | -3.89031300 | -1.85876200 |
| H  | 1.37558100  | -3.59569600 | -2.56534200 |
| C  | -0.40105100 | -2.96148500 | -1.49232500 |
| H  | -0.37914400 | -1.93966200 | -1.90499200 |
| C  | -4.03264300 | -2.29459800 | -1.41024100 |
| C  | -4.96858400 | -1.25027100 | -1.57592400 |
| H  | -4.86692400 | -0.32700800 | -0.98213200 |
| C  | -6.01835500 | -1.38217300 | -2.49704400 |
| H  | -6.74505100 | -0.56374100 | -2.61751100 |
| C  | -6.13412900 | -2.54981600 | -3.27147000 |
| H  | -6.95206300 | -2.64827000 | -4.00208500 |
| C  | -5.20007400 | -3.58697900 | -3.11702700 |
| H  | -5.28305300 | -4.50133900 | -3.72491300 |
| C  | -4.15331700 | -3.46521200 | -2.18745700 |
| H  | -3.42785800 | -4.28494200 | -2.07319000 |
| C  | -3.43008300 | -2.63556000 | 1.43464700  |
| C  | -4.65620800 | -3.33051700 | 1.49224000  |
| H  | -5.21585600 | -3.54780500 | 0.56982800  |
| C  | -5.16922800 | -3.74791200 | 2.73194400  |
| H  | -6.12769800 | -4.28878000 | 2.76933100  |
| C  | -4.46427400 | -3.47687600 | 3.91583200  |
| H  | -4.86930700 | -3.80425800 | 4.88612200  |
| C  | -3.24332600 | -2.78237400 | 3.85972700  |
| H  | -2.68935900 | -2.56262100 | 4.78585400  |
| C  | -2.72489900 | -2.35572700 | 2.62733500  |
| Cl | 0.07162200  | -0.10034500 | 1.93267400  |
| C  | -1.32995700 | 2.12954500  | -0.37384800 |
| C  | -2.23088500 | 2.49611000  | -1.20244200 |
| H  | -3.08794500 | 2.50219600  | -1.87224100 |
| C  | -0.20473300 | 2.91117400  | 0.23660600  |
| H  | 0.09273300  | 2.46494800  | 1.20526400  |
| H  | 0.67671800  | 2.82210100  | -0.43929600 |
| N  | -0.56553400 | 4.30837600  | 0.43383500  |
| H  | -0.33657100 | 4.71098000  | 1.34607100  |
| C  | -1.32936700 | 5.04965300  | -0.40479100 |
| O  | -1.83222800 | 4.59086400  | -1.46270500 |
| C  | -1.57926400 | 6.47804200  | -0.01857000 |
| C  | -2.72179200 | 7.11648800  | -0.54697300 |
| C  | -0.70104300 | 7.20698300  | 0.81336400  |
| C  | -2.99765200 | 8.45200000  | -0.22550000 |
| H  | -3.38817800 | 6.54458400  | -1.20955600 |
| C  | -0.97702300 | 8.54597000  | 1.12753100  |

|   |             |             |             |
|---|-------------|-------------|-------------|
| H | 0.21988000  | 6.74179900  | 1.19942300  |
| C | -2.12693000 | 9.16898200  | 0.61380600  |
| H | -3.89687200 | 8.93891700  | -0.63344400 |
| H | -0.28329800 | 9.10908300  | 1.77058900  |
| H | -2.34113600 | 10.22006500 | 0.86236200  |
| H | -1.77207300 | -1.79673300 | 2.58923400  |
| C | 5.09829900  | -0.39278500 | 0.20769100  |
| C | 5.45093200  | 0.25029600  | -0.98712600 |
| C | 6.79331400  | 0.18582800  | -1.42438500 |
| C | 7.76512100  | -0.51173200 | -0.67371900 |
| C | 7.37823400  | -1.14904600 | 0.52572100  |
| C | 6.03930000  | -1.09373000 | 0.97466600  |
| H | 5.77137400  | -1.60108100 | 1.91205300  |
| H | 4.71966700  | 0.80165200  | -1.59474900 |
| H | 8.80501100  | -0.55668500 | -1.01678400 |
| O | 7.06437000  | 0.83091000  | -2.59087400 |
| O | 8.23683600  | -1.84421700 | 1.31905100  |
| C | 8.39119300  | 0.80435900  | -3.09966400 |
| H | 8.37358900  | 1.38340000  | -4.04237700 |
| H | 9.11460100  | 1.27970200  | -2.40073400 |
| H | 8.73071700  | -0.23167400 | -3.32151800 |
| C | 9.60100600  | -1.94560900 | 0.93352400  |
| H | 10.09262400 | -0.94905600 | 0.87712200  |
| H | 10.10109500 | -2.54598700 | 1.71696200  |
| H | 9.71956400  | -2.46245600 | -0.04455300 |
| I | 3.05773300  | -0.29856900 | 0.88398200  |

Table S32. Calculated Gibbs energy and XYZ coordinates for all atoms in **IM2c** activated by  $C_8H_9O_2I$ .

$G = -2904.9680$ Hartree

|    |             |             |             |
|----|-------------|-------------|-------------|
| P  | -2.75841500 | -1.96939300 | -0.16152400 |
| C  | -1.36778600 | -3.08503500 | -0.62193900 |
| Au | -2.18648300 | 0.30503600  | -0.26612900 |
| C  | -1.18642800 | -4.35192900 | -0.03197300 |
| H  | -1.87908200 | -4.70170900 | 0.74869600  |
| C  | -0.11526400 | -5.16772600 | -0.43209800 |
| H  | 0.02331700  | -6.15351800 | 0.03855500  |
| C  | 0.77871700  | -4.72245200 | -1.42172300 |
| H  | 1.62155300  | -5.36169100 | -1.72745400 |
| C  | 0.60391600  | -3.45918800 | -2.00897600 |
| H  | 1.30949000  | -3.10390300 | -2.77578800 |
| C  | -0.46169000 | -2.63904700 | -1.61081900 |

|    |             |             |             |
|----|-------------|-------------|-------------|
| H  | -0.59007800 | -1.63998300 | -2.05859500 |
| C  | -4.13775400 | -2.40571100 | -1.30804800 |
| C  | -5.16579400 | -1.45781200 | -1.50044700 |
| H  | -5.11147100 | -0.48238700 | -0.98991800 |
| C  | -6.24874800 | -1.75203600 | -2.34386600 |
| H  | -7.04722300 | -1.00424900 | -2.48660800 |
| C  | -6.30698500 | -2.98452200 | -3.01113700 |
| H  | -7.15263600 | -3.21150800 | -3.68208400 |
| C  | -5.28090100 | -3.92980100 | -2.83055900 |
| H  | -5.31945000 | -4.89366800 | -3.35892000 |
| C  | -4.19875400 | -3.64399000 | -1.98046800 |
| H  | -3.39933300 | -4.38858300 | -1.84607500 |
| C  | -3.31329900 | -2.53807000 | 1.50227700  |
| C  | -4.47799900 | -3.31484600 | 1.68371800  |
| H  | -5.09666600 | -3.60416600 | 0.82069000  |
| C  | -4.85495200 | -3.71977000 | 2.97582400  |
| H  | -5.76668200 | -4.32199100 | 3.11302700  |
| C  | -4.07691500 | -3.35727000 | 4.08493000  |
| H  | -4.37586300 | -3.67829700 | 5.09676300  |
| C  | -2.91774100 | -2.58508900 | 3.90444700  |
| H  | -2.30334500 | -2.29385900 | 4.77099900  |
| C  | -2.53361600 | -2.16691900 | 2.61949200  |
| Cl | 0.18007400  | 0.18257000  | 2.16147400  |
| C  | -1.71670400 | 2.30689300  | -0.41862600 |
| C  | -2.61571600 | 3.26034900  | -0.71310000 |
| H  | -3.67837100 | 3.15870900  | -0.96247900 |
| C  | -0.30179700 | 2.73177100  | -0.11515600 |
| H  | 0.07565200  | 2.19130700  | 0.78615900  |
| H  | 0.38528400  | 2.47676400  | -0.95489700 |
| N  | -0.22618500 | 4.18462900  | 0.13869100  |
| H  | 0.60785800  | 4.53698000  | 0.62210900  |
| C  | -1.14761400 | 5.06092500  | -0.20703500 |
| O  | -2.29030800 | 4.66500600  | -0.72490100 |
| C  | -0.98430100 | 6.51209000  | -0.02056000 |
| C  | -2.12782700 | 7.34356100  | -0.07256100 |
| C  | 0.29038900  | 7.08634400  | 0.19783200  |
| C  | -1.99532100 | 8.72567800  | 0.10737500  |
| H  | -3.11753600 | 6.89650000  | -0.24170900 |
| C  | 0.41213700  | 8.46927300  | 0.37778900  |
| H  | 1.19769200  | 6.46275100  | 0.21009500  |
| C  | -0.72826200 | 9.29026800  | 0.33283200  |
| H  | -2.88859500 | 9.36735000  | 0.07253600  |
| H  | 1.40633700  | 8.91091700  | 0.54255200  |
| H  | -0.62714400 | 10.37775000 | 0.47112300  |

|   |             |             |             |
|---|-------------|-------------|-------------|
| H | -1.62514200 | -1.54714300 | 2.49197800  |
| C | 4.97019700  | -0.65078100 | 0.24109700  |
| C | 5.30340700  | -0.15565600 | -1.03030800 |
| C | 6.61204600  | -0.35394600 | -1.52367100 |
| C | 7.57898700  | -1.03974200 | -0.75201800 |
| C | 7.21583700  | -1.52761400 | 0.52584900  |
| C | 5.90921900  | -1.33495400 | 1.02568500  |
| H | 5.66164600  | -1.72428400 | 2.02458600  |
| H | 4.57479200  | 0.38018000  | -1.65712300 |
| H | 8.59148400  | -1.18895800 | -1.13711200 |
| O | 6.86237800  | 0.15463000  | -2.76069100 |
| O | 8.06873100  | -2.19571000 | 1.34558000  |
| C | 8.15935100  | 0.00094200  | -3.31691400 |
| H | 8.13287100  | 0.48497200  | -4.31173300 |
| H | 8.94009800  | 0.49571700  | -2.70016500 |
| H | 8.43194000  | -1.07293800 | -3.44685200 |
| C | 9.40416800  | -2.42488700 | 0.90913600  |
| H | 9.95063900  | -1.47245600 | 0.72829100  |
| H | 9.90541400  | -2.97469800 | 1.72790100  |
| H | 9.44146900  | -3.04425600 | -0.01433900 |
| I | 2.96920500  | -0.33841400 | 1.01206300  |

Table S33. Calculated Gibbs energy and XYZ coordinates for all atoms in **TS2c'** activated by C<sub>8</sub>H<sub>9</sub>O<sub>2</sub>I.

$G = -2904.9624$  Hartree      Frequency = -127.44

|    |             |            |             |
|----|-------------|------------|-------------|
| P  | 0.63919800  | 2.95552500 | 0.15223100  |
| C  | -1.02449900 | 3.10366100 | -0.61565900 |
| Au | 2.03823800  | 1.59201600 | -1.09566100 |
| C  | -2.18750900 | 2.63578400 | 0.02797500  |
| H  | -2.12674300 | 2.20257300 | 1.03776200  |
| C  | -3.42951500 | 2.71223200 | -0.62618700 |
| H  | -4.33133500 | 2.32328000 | -0.12761700 |
| C  | -3.51546900 | 3.26163000 | -1.91506700 |
| H  | -4.48924700 | 3.31830500 | -2.42582900 |
| C  | -2.35623100 | 3.73049100 | -2.55882800 |
| H  | -2.41930000 | 4.15709400 | -3.57184100 |
| C  | -1.11203200 | 3.64434600 | -1.91871000 |
| H  | -0.20475200 | 3.99856900 | -2.43427300 |
| C  | 1.27628900  | 4.66545400 | 0.35928000  |
| C  | 2.67023200  | 4.84774000 | 0.49029500  |
| H  | 3.34555600  | 3.97882800 | 0.42852800  |
| C  | 3.19371400  | 6.13307100 | 0.69462100  |
| H  | 4.28150800  | 6.26942200 | 0.79488400  |
| C  | 2.33287700  | 7.24203100 | 0.76232400  |



|    |             |             |             |
|----|-------------|-------------|-------------|
| H  | 2.74596900  | 8.25101200  | 0.91589600  |
| C  | 0.94619300  | 7.06397500  | 0.62739700  |
| H  | 0.26958300  | 7.93111600  | 0.67656200  |
| C  | 0.41369100  | 5.77985000  | 0.42708300  |
| H  | -0.67384300 | 5.64948900  | 0.31859900  |
| C  | 0.39723400  | 2.27434900  | 1.84128800  |
| C  | -0.00426400 | 3.09447800  | 2.91819500  |
| H  | -0.16157600 | 4.17396700  | 2.76970600  |
| C  | -0.19870300 | 2.52955900  | 4.18847300  |
| H  | -0.50841900 | 3.17266000  | 5.02685300  |
| C  | 0.00335900  | 1.15284600  | 4.39254500  |
| H  | -0.14889500 | 0.71775700  | 5.39261600  |
| C  | 0.40515900  | 0.33480400  | 3.32406100  |
| H  | 0.57438400  | -0.74635100 | 3.45437300  |
| C  | 0.60625700  | 0.89525300  | 2.05330500  |
| Cl | 1.11662400  | -3.13256200 | 1.82266000  |
| C  | 2.90614900  | -0.76321500 | -1.99422300 |
| C  | 3.40814200  | 0.38811600  | -2.18321500 |
| H  | 4.31101900  | 0.83456300  | -2.61684600 |
| C  | 1.98140700  | -1.84893400 | -1.64592300 |
| H  | 1.11645300  | -1.43788500 | -1.08560600 |
| H  | 1.57710500  | -2.28431500 | -2.58996000 |
| N  | 2.64105300  | -2.85050300 | -0.83581500 |
| H  | 2.18314400  | -3.10426700 | 0.08547200  |
| C  | 3.91587400  | -3.11447000 | -1.19911400 |
| O  | 4.41140200  | -2.47955200 | -2.16728100 |
| C  | 4.69669300  | -4.15098000 | -0.45791700 |
| C  | 6.01185600  | -4.42098500 | -0.89461900 |
| C  | 4.16994200  | -4.85822000 | 0.64633900  |
| C  | 6.79018600  | -5.38653000 | -0.24288400 |
| H  | 6.40691900  | -3.85819600 | -1.75338600 |
| C  | 4.95666700  | -5.81952400 | 1.29802600  |
| H  | 3.15155600  | -4.65062900 | 1.01753400  |
| C  | 6.26329800  | -6.08850200 | 0.85529100  |
| H  | 7.81412100  | -5.59267000 | -0.59129300 |
| H  | 4.54323100  | -6.36391400 | 2.16115800  |
| H  | 6.87394100  | -6.84724000 | 1.36941100  |
| H  | 0.93745800  | 0.24920700  | 1.22460200  |
| C  | -3.84235000 | -2.27871200 | 0.25443300  |
| C  | -4.37938400 | -1.01119200 | 0.52245000  |
| C  | -5.70002700 | -0.72800900 | 0.11050500  |
| C  | -6.47420900 | -1.70321100 | -0.55483600 |
| C  | -5.90825500 | -2.97287200 | -0.80657100 |
| C  | -4.58543900 | -3.26752600 | -0.40490500 |

|   |             |             |             |
|---|-------------|-------------|-------------|
| H | -4.17515900 | -4.26463800 | -0.61886800 |
| H | -3.80351000 | -0.23532000 | 1.04586200  |
| H | -7.49902500 | -1.47916500 | -0.87164600 |
| O | -6.15322500 | 0.52680600  | 0.39508800  |
| O | -6.57094300 | -3.97901000 | -1.43805600 |
| C | -7.48105300 | 0.87845400  | 0.02557100  |
| H | -7.62939700 | 1.92304200  | 0.35843900  |
| H | -7.63422500 | 0.82693200  | -1.07510300 |
| H | -8.23409600 | 0.23134400  | 0.52674900  |
| C | -7.90724900 | -3.75922100 | -1.86947200 |
| H | -7.97336700 | -2.93619200 | -2.61539500 |
| H | -8.23799400 | -4.70073800 | -2.34746100 |
| H | -8.58675600 | -3.53094600 | -1.01849700 |
| I | -1.81707800 | -2.69422400 | 0.87494100  |

Table S34. Calculated Gibbs energy and XYZ coordinates for all atoms in **IM2c'** activated by C<sub>8</sub>H<sub>9</sub>O<sub>2</sub>I.

$G = -2904.9867$  Hartree

|    |             |             |             |
|----|-------------|-------------|-------------|
| P  | -3.59049100 | -0.52355200 | 0.03256200  |
| C  | -2.73211400 | -1.79808600 | -0.98539700 |
| Au | -2.55200000 | 1.56494000  | -0.26304900 |
| C  | -1.87611400 | -2.75518600 | -0.40363600 |
| H  | -1.77293600 | -2.81585000 | 0.69046900  |
| C  | -1.13802200 | -3.62976600 | -1.21979100 |
| H  | -0.45161100 | -4.35438300 | -0.75403300 |
| C  | -1.25952600 | -3.56341400 | -2.61681300 |
| H  | -0.67982100 | -4.24893800 | -3.25430600 |
| C  | -2.11452700 | -2.61230900 | -3.20122800 |
| H  | -2.21029300 | -2.55251300 | -4.29653500 |
| C  | -2.83944800 | -1.72437800 | -2.39306300 |
| H  | -3.49153500 | -0.96936700 | -2.86062700 |
| C  | -5.36600900 | -0.58849100 | -0.44669900 |
| C  | -6.14310200 | 0.57262500  | -0.24150800 |
| H  | -5.66930600 | 1.48325100  | 0.15992200  |
| C  | -7.51139000 | 0.56967300  | -0.55315700 |
| H  | -8.10979000 | 1.47940400  | -0.39064100 |
| C  | -8.11132800 | -0.58674100 | -1.07961800 |
| H  | -9.18355900 | -0.58616900 | -1.33003400 |
| C  | -7.34052600 | -1.74183600 | -1.29280900 |
| H  | -7.80661200 | -2.64830400 | -1.70928500 |
| C  | -5.97191200 | -1.74755200 | -0.97767200 |
| H  | -5.37562500 | -2.65612800 | -1.15259200 |

|    |             |             |             |
|----|-------------|-------------|-------------|
| C  | -3.51283100 | -1.13583500 | 1.76857900  |
| C  | -4.37418700 | -2.14668900 | 2.24622400  |
| H  | -5.13887300 | -2.58447300 | 1.58646500  |
| C  | -4.26249200 | -2.59430400 | 3.57169300  |
| H  | -4.93987300 | -3.38049300 | 3.93969700  |
| C  | -3.29343000 | -2.04117100 | 4.42671400  |
| H  | -3.21059800 | -2.39437800 | 5.46634000  |
| C  | -2.43510900 | -1.03419200 | 3.95594300  |
| H  | -1.67748900 | -0.59480300 | 4.62302200  |
| C  | -2.54601000 | -0.57811600 | 2.63248700  |
| Cl | 4.54976700  | 2.42605400  | 1.35190900  |
| C  | -0.26440100 | 3.50580300  | -0.29072200 |
| C  | -1.56796700 | 3.33595900  | -0.55493800 |
| H  | -2.09005400 | 4.22117800  | -0.96500600 |
| C  | 0.81002900  | 2.59064000  | 0.26436300  |
| H  | 0.58915600  | 2.23343900  | 1.29338300  |
| H  | 0.98901300  | 1.69379000  | -0.36724300 |
| N  | 1.98369900  | 3.45858800  | 0.26708100  |
| H  | 2.95414400  | 3.11872100  | 0.64830000  |
| C  | 1.67564500  | 4.64985300  | -0.19068000 |
| O  | 0.39462200  | 4.76664900  | -0.53598400 |
| C  | 2.56276500  | 5.79982600  | -0.35204800 |
| C  | 2.03258500  | 7.02300100  | -0.82691800 |
| C  | 3.93973100  | 5.69388800  | -0.04061500 |
| C  | 2.87456500  | 8.12954000  | -0.98586700 |
| H  | 0.96251900  | 7.09836800  | -1.06760500 |
| C  | 4.76949400  | 6.80924500  | -0.20451800 |
| H  | 4.35712500  | 4.74010800  | 0.32955800  |
| C  | 4.24178300  | 8.02472500  | -0.67530200 |
| H  | 2.46212700  | 9.08084500  | -1.35448200 |
| H  | 5.84018700  | 6.72836500  | 0.03699400  |
| H  | 4.90150400  | 8.89721000  | -0.80160800 |
| H  | -1.88255600 | 0.22061800  | 2.26185500  |
| C  | 4.08000800  | -2.70255400 | 0.11123900  |
| C  | 2.87170700  | -3.37864900 | 0.33556000  |
| C  | 2.79883800  | -4.75743600 | 0.03520400  |
| C  | 3.91661600  | -5.44626700 | -0.48329900 |
| C  | 5.11902400  | -4.73758400 | -0.69912300 |
| C  | 5.20686200  | -3.35874900 | -0.40327600 |
| H  | 6.15815700  | -2.83732900 | -0.58020000 |
| H  | 1.98527300  | -2.87199700 | 0.74252300  |
| H  | 3.85309500  | -6.51559400 | -0.71420700 |
| O  | 1.59729400  | -5.35592300 | 0.27935200  |
| O  | 6.25085400  | -5.30821300 | -1.19178000 |

|   |            |             |             |
|---|------------|-------------|-------------|
| C | 1.46095600 | -6.75093100 | 0.03452200  |
| H | 0.42436900 | -7.01553000 | 0.31648700  |
| H | 1.61712200 | -7.00261300 | -1.03768300 |
| H | 2.16556600 | -7.34841500 | 0.65375100  |
| C | 6.24321700 | -6.69419700 | -1.50683400 |
| H | 5.50298900 | -6.93578600 | -2.30153400 |
| H | 7.25720900 | -6.93299800 | -1.87975900 |
| H | 6.03242600 | -7.32269500 | -0.61322500 |
| I | 4.23150100 | -0.60525900 | 0.58806800  |
